# 1 High-Speed Low-Light *In Vivo* Two-Photon Voltage Imaging of Large Neuronal Populations

2

3 Jelena Platisa<sup>1,2,3,9</sup>, Xin Ye<sup>4,5,9</sup>, Allison M. Ahrens<sup>6</sup>, Chang Liu<sup>7</sup>, Ichun Anderson Chen<sup>5</sup>, Ian G.

4 Davison<sup>5,6,8</sup>, Lei Tian<sup>4,5,7</sup>, Vincent A. Pieribone<sup>1,2,3\*</sup>, Jerry L. Chen<sup>4,5,6,8\*</sup>

5

6 <sup>1</sup>*Department of Cellular and Molecular Physiology, Yale University, New Haven CT 06510*

7 <sup>2</sup>*Department of Neuroscience, Yale University, New Haven CT 06510*

8 <sup>3</sup>*The John B. Pierce Laboratory, New Haven CT 06519*

9 <sup>4</sup>*Department of Biomedical Engineering, Boston University, Boston MA 02215*

10 <sup>5</sup>*Center for Neurophotonics, Boston University, Boston MA 02215*

11 <sup>6</sup>*Department of Biology, Boston University, Boston MA 02215*

12 <sup>7</sup>*Department of Electrical and Computer Engineering, Boston University, Boston MA 02215*

13 <sup>8</sup>*Center for Systems Neuroscience, Boston University, Boston MA 02215*

14 <sup>9</sup>*These authors contributed equally to this work.*

15

16 \*Correspondence: [vpieribo@jbpierce.org](mailto:vpieribo@jbpierce.org) (V.A.P.), [jerry@chen-lab.org](mailto:jerry@chen-lab.org) (J.L.C.)

17

18

## 19 SUMMARY

20

21 Monitoring spiking activity across large neuronal populations at behaviorally relevant timescales is critical  
22 for understanding neural circuit function. Unlike calcium imaging, voltage imaging requires kilohertz  
23 sampling rates which reduces fluorescence detection to near shot noise levels. High-photon flux excitation  
24 can overcome photon-limited shot noise but photo-bleaching and photo-damage restricts the number and  
25 duration of simultaneously imaged neurons. We investigated an alternative approach aimed at low two-  
26 photon flux, voltage imaging below the shot noise limit. This framework involved developing: a positive-  
27 going voltage indicator with improved spike detection (SpikeyGi); an ultra-fast two-photon microscope for  
28 kilohertz frame-rate imaging across a 0.4x0.4mm<sup>2</sup> field of view, and; a self-supervised denoising algorithm  
29 (DeepVID) for inferring fluorescence from shot-noise limited signals. Through these combined advances,  
30 we achieved simultaneous high-speed, deep-tissue imaging of more than one hundred densely-labeled  
31 neurons over one hour in awake behaving mice. This demonstrates a scalable approach for voltage imaging  
32 across increasing neuronal populations.

33

34

35

36

## 37 INTRODUCTION

38 To understand the nervous system, experiments are needed in which activity from large numbers of neurons  
39 can be measured in a detailed and comprehensive manner across multiple timescales during behavior.  
40 Current approaches to image neuronal activity at cellular resolution occupy two ends of a spectrum;  
41 recording large populations of neurons at very slow sampling rates (i.e. calcium imaging) or very high  
42 speed voltage imaging of small numbers of cells. However, calcium imaging is a poor proxy for action  
43 potential activity (Huang et al., 2021). To measure spiking accurately using voltage indicators, sampling  
44 must be at least an order of magnitude faster (~400 Hz) (Sjulson and Miesenbock, 2007; Wilt et al., 2013)  
45 than calcium imaging (<15 Hz). To date, ultra-fast voltage imaging (1kHz) has only been achieved,  
46 simultaneously, in a small number (~10) of neurons (Abdelfattah et al., 2019; Piatkevich et al., 2019;  
47 Villette et al., 2019; Wu et al., 2020). The goal of the present studies are to achieve high speed recording  
48 of a large number of neurons *in vivo*.

49 To optically resolve individual action potential in numerous neurons *in vivo* faces two critical  
50 limitations. The first limit is determined by photon shot noise. Under the assumption of adequate indicator  
51 sensitivity, a sufficient number of genetically encoded voltage indicator (GEVI) molecules need to be  
52 excited for changes in fluorescence associated with action potential firing to be reliably detected above  
53 photon shot noise statistics. To achieve adequate signal-to-noise, current approaches for one-photon (1P)  
54 and two-photon (2P) voltage imaging have relied on “high photon flux” regimes in which excitation light  
55 is concentrated on a small population of tens of neurons (Adam et al., 2019; Villette et al., 2019). One-  
56 photon cellular resolution voltage imaging is achievable using widefield illumination and high frame-rate  
57 cameras but has limited depth penetration (Abdelfattah et al., 2019; Piatkevich et al., 2019). Due to light  
58 scattering, only neuronal populations at shallow depths or those sparsely labeled can be imaged with  
59 minimal signal degradation. Alternatively, 2P microscopy enables deeper imaging of densely labeled tissue  
60 at kilohertz acquisition rates but has been limited to a small field of views (FOVs) due to existing excitation  
61 and scanning strategies (Villette et al., 2019; Wu et al., 2020; Zhang et al., 2019).

62 High photon flux is partially driven by the characteristics of currently used 2P-compatible GEVIs  
63 that fluoresce at resting membrane potential and decrease their fluorescence during action potentials  
64 (negative slope fluorescence-voltage relationship, i.e., “negative going” indicator) (Chamberland et al.,  
65 2017; Jin et al., 2012; Villette et al., 2019). This means that, in addition to potentially mislocalized proteins,  
66 GEVI molecules at resting state also contribute to background fluorescence and light scatter (Abdelfattah  
67 et al., 2020; Piatkevich et al., 2019), further reducing detectable spike-related changes in fluorescence.  
68 Under both 1P and 2P imaging conditions, high photon flux prevents sustained voltage imaging due to rapid  
69 photobleaching which limits recording times to short durations (i.e., several minutes) (Abdelfattah et al.,  
70 2020; Piatkevich et al., 2019; Villette et al., 2019). Further, high photon flux excitation cannot be scaled  
71 for imaging larger neuronal populations. This is due to a second fundamental limit related to the total  
72 amount of excitation power that can be delivered into the brain without introducing photodamage  
73 (Podgorski and Ranganathan, 2016). Thus, when imaging at high speeds, the overall photon budget forces  
74 a trade-off in which the amount of excitation light available to each neuron decreases as the number of  
75 imaged neurons increases.

76 To achieve ultra-fast voltage imaging across large neuronal populations, these fundamental limits  
77 need to be overcome. We adopted a multidisciplinary approach to address this, integrating protein  
78 engineering, optical engineering, and deep learning. We developed a high-speed, positive-going 2P GEVI,  
79 a kilohertz-scanning, large-FOV 2P microscope, and a deep convolutional neuronal network for image  
80 denoising. Through this synergistic combination of technologies, we provide a new framework for  
81 population-level 2P voltage imaging in the awake behaving animal.

82

## 83 RESULTS

### 84 Development of positive-going two-photon compatible genetically encoded voltage indicator

85 We recently showed that we can manipulate the direction of the voltage-dependent fluorescence response  
86 of GEVIs by modifying amino acid residues determining the chromophore protonation state (Platasa et al.,  
87 2017) (**Figure 1A**). By mutating amino acid residues, D147A and H148A, within the green fluorescent

88 protein (GFP) of the “negative-going” indicator ArcLight (Jin et al., 2012), we produced GEVI Marina  
89 (Platisa et al., 2017). This “positive-going” indicator is more advantageous for *in vivo* application due to  
90 lower background and improved photostability. However, despite optimal voltage sensitivity and optical  
91 properties, spike detection with Marina is limited by its suboptimal kinetics ( $\tau \sim 10$  ms). Therefore, to  
92 develop a high-speed, positive-going voltage indicator, we devised a directed evolution strategy targeting  
93 the fastest available, negative-going, 2P compatible GEVIs, ASAP2f and ASAP3 (Chamberland et al., 2017;  
94 Villette et al., 2019).

95 We began by creating site-directed mutagenic libraries of amino acid residues within the ASAP2f  
96 fluorescent protein (S149, and H150; from the starting Met of ASAP2f) that are homologous to those in  
97 ArcLight/Marina (D147 and H148; numbering from starting Met of SuperEcliptic pHluorin GFP).  
98 Additional libraries targeted four residues at the linker region between the voltage-sensitive and FP domains  
99 (L145, S146, F147, and N148). Functional screening showed that most variants produced signals that were  
100 either smaller or similar to the parent constructs. However, as seen with Arclight and Marina, mutation of  
101 H150 residue produced several variants with reversed signal polarity, i.e., a modest increase in fluorescence  
102 upon depolarization (data not shown). We then used primers with the degenerative codons NNKNNK to  
103 create an insertional library targeted between residues H151 and N152 in ASAP3 (**Figure 1B**). To ensure  
104 that all 400 potential variants were screened, we tested 1104 mutants produced in two separate PCR  
105 reactions. Out of all mutants screened, a  $\sim 150$  positive-going variants were detected (**Figure 1C**). In one  
106 mutant, a large  $\Delta F/F_0$  of +30% was observed using field stimulation (**Figure 1C-D**). Subsequently,  
107 simultaneous high-speed 1P imaging (500-1000Hz) and whole-cell patch-clamp electrophysiology of HEK  
108 cells transiently expressing this mutant showed an average  $+18.7 \pm 1.1\%$   $\Delta F/F_0$  response to 100 mV step  
109 depolarization ( $n = 8$  cells) (**Figure 1E-F**). Sequence analysis of this indicator revealed the insertion of  
110 amino acids DS; this indicator was named SpikeyGi.

111 Along with our efforts to generate positive-going 2P GEVIs, we developed additional negative-  
112 going 2P GEVIs with improved signal characteristics. We created site-directed libraries targeted to the 26  
113 amino acid residues between the circularly permuted sfGFP and S4 sequences of the voltage-sensitive  
114 domain of ASAP3 (residues 370-395 in ASAP3 from starting Met, **Figure 1A-B**). Two subsequent  
115 mutagenesis and functional screening rounds (at positions 394 and 395) led us to the double mutant M394W  
116 P395V that shows sensitivity optimized to detect depolarizations (**Figure 1E and F**). Compared to parent  
117 GEVI ASAP3, this novel variant, named SpikeyG, showed increased sensitivity to transient 100mV step  
118 depolarizations ( $\Delta F/F_0$ : SpikeyG,  $-55.7 \pm 1.9\%$ ,  $n = 6$  cells; ASAP3,  $-38.1 \pm 1.6\%$ ,  $n = 8$  cells, Student's *t*-  
119 test;  $p < 0.00002$ ; **Figure 1D**). At the same time, sensitivity to transient -50mV step hyperpolarization (-  
120 110mV voltage step from -70mV holding potential) decreased for SpikeyG ( $\Delta F/F_0$ : SpikeyG,  $24.6 \pm 2.1\%$ ,  
121  $n = 5$  cells; ASAP3,  $51.4 \pm 4.2\%$ ,  $n = 8$  cells. Student's *t*-test;  $p < 0.0002$ ; **Figure 1E**). Overall, our directed  
122 mutagenesis of fast two-photon-compatible GEVIs produced two improved candidates with the potential  
123 for increased sensitivity for spike detection.

124

### 125 ***In vitro* characterization of SpikeyG and SpikeyGi with high photon flux excitation**

126 To determine the suitability of SpikeyG or SpikeyGi for action potential detection in neurons, we first  
127 characterized responses of SpikeyG and SpikeyGi *in vitro* with simultaneous whole-cell patch clamp  
128 electrophysiology and two-photon imaging. We targeted layer 2/3 neurons in brain slices from animals  
129 virally expressing either SpikeyG or SpikeyGi. Fluorescence responses across different membrane  
130 potentials were measured under voltage-clamp mode. We imaged single neurons under high photon flux  
131 conditions using a conventional two-photon microscope with an 80 MHz repetition rate laser source, similar  
132 to previous studies (Bando et al., 2019; Chamberland et al., 2017). Using frame scanning (128x85 pixels,  
133 0.3-0.6 $\mu\text{m}$ /pixel. 2.8 $\mu\text{s}$  dwell time, 35-45mW average power), the targeted cell received  $\sim 5 \times 10^5$  pulses per  
134 50ms time bin (**Figure 2A**). SpikeyG showed linear changes in response to voltage steps, with negative  
135 steps producing an increase in fluorescence and positive steps producing a decrease in fluorescence.  
136 SpikeyGi responded in the opposite direction with positive steps increasing fluorescence (**Figure 2B-C**).  
137 At +50mV (-120mV voltage step from -70mV holding potential), SpikeyGi showed larger magnitude  
138 fluorescence changes than SpikeyG ( $\Delta F/F_0$ : SpikeyGi,  $29.4 \pm 4.7\%$ ; SpikeyG,  $-14.6 \pm 5.1\%$ ). We next

139 characterized single action potential responses of SpikeyG and SpikeyGi triggered at 100-ms intervals  
140 (average of 10 traces). Line scans at 3-5 kHz were performed along the cell membrane (24-54 pixels, 2.8  
141  $\mu$ s dwell time), equivalent to  $\sim$ 9000 excitation pulses per 1ms time bin. Both GEVIs showed clear responses  
142 to action potentials with similar kinetics. SpikeyGi exhibited greater magnitude peak responses compared  
143 to SpikeyG ( $\Delta F/F_0$ : SpikeyGi,  $32.6 \pm 0.9\%$ ; SpikeyG,  $-21.2 \pm 0.4\%$ ; Student's *t*-test,  $p < .001$ ) (**Figure 2D**).  
144 These results demonstrate that both SpikeyG and SpikeyGi are capable of reporting single APs under high  
145 photon flux conditions.

146

### 147 **Ultra-fast two-photon microscope design and performance**

148 To perform two-photon voltage imaging across a large population of neurons, we sought to design an ultra-  
149 fast two-photon microscope capable of imaging a  $400 \times 400 \mu\text{m}^2$  field-of-view (FOV) at a kilohertz frame  
150 rate. While existing ultra-fast two-photon microscopes operate in a high-photon photon flux regime, we  
151 set out to construct a system optimized for “low-photon flux” excitation (**Figure 3A**). Two-photon  
152 excitation is achieved through pulsed lasers. Hence, the pulse repetition rate determines the total FOV that  
153 can be excited within a one-millisecond time bin. A minimum of one pulse is needed per imaging voxel to  
154 cover the entire FOV. To increase the FOV size while maintaining full coverage, the effective repetition  
155 rate of the imaging system needs to increase proportionally. This can be achieved through either temporal  
156 or spatial multiplexing. Temporal multiplexing creates multiple excitation beamlets that are delayed in  
157 time such that the resulting fluorescence detected by a single photomultiplier tube (PMT) can be  
158 disambiguated by their timing (Amir et al., 2007; Chen et al., 2016; Cheng et al., 2011; Clough et al., 2021).  
159 However, the degree of temporal multiplexing is limited by the fluorescence lifetime of the excited  
160 fluorophore which places an upper limit on the effective repetition rate using this approach. In contrast,  
161 there is no limit to the effective repetition rate formed by spatial multiplexed beamlets in which multiple  
162 pulses are delivered into different regions of the tissue simultaneously (Kim et al., 2007; Zhang et al., 2019).  
163 Resolution of spatially multiplexed beamlets does require spatial detection using cameras or multi-anode  
164 PMTs (MAPMTs). Consequently, spatial multiplexing is depth limited as crosstalk between neighboring  
165 detectors increases with depth due to scattered fluorescence. This spatial crosstalk can be reduced by  
166 increasing the spacing of the beamlets at the sample.

167 To maximize the effective repetition rate used in the UF2P microscope, spatial and temporal  
168 multiplexing were combined in the same system (**Figure 3B, S1**). For the excitation source, we selected  
169 a 920nm 31.25MHz fiber laser which enables beamlets to be temporally multiplexed four times at 8-ns  
170 pulse intervals, sufficient to resolve GFP-based indicators with minimal cross talk. Compared to 80 MHz  
171 Ti:sapphire lasers traditionally used for two-photon imaging, the lower repetition rate also provides  $>2.5x$   
172 greater pulse energy at the same average power, providing more efficient excitation per laser pulse (Charan  
173 et al., 2018). Each temporally multiplexed beamlet was then split into a pair of spatially multiplexed beams  
174 positioned  $200 \mu\text{m}$  apart at the sample to minimize scatter-related crosstalk. This generated a total of 8  
175 beamlets (4 temporal X 2 spatial). The result is an illumination source with an effective 250 MHz repetition  
176 rate, which is  $>3x$  higher than traditional systems scanning a single beam with 80MHz repetition rate. For  
177 raster scanning, we used a resonant mirror with 24kHz line rates for x-scanning and a galvanometric mirror  
178 for y-scanning. Since fast scanning is achieved along the x-axis, the beamlets were linearly arranged along  
179 the slower y-axis. The four temporally multiplexed beamlet pairs were spaced  $50 \mu\text{m}$  apart at the sample  
180 (**Figure 3C**). Thus, each beamlet scanned a  $400 \times 50 \mu\text{m}$  sub-area, when tiled together, resulting in a total  
181 FOV of  $400 \times 400 \mu\text{m}^2$ . Each sub-area was slightly offset in the x-axis as a result of the patterning of the  
182 beamlets with respect to the position of the resonance scanner. By scanning 24 lines per subarea either,  
183 unidirectionally or bidirectionally, we achieved 803 or 1000 Hz frame rates, respectively. A linearly  
184 arranged MAPMT and matching detection optics were designed to project the imaging plane onto the  
185 detectors such that each anode collected fluorescence from a corresponding spatially multiplexed beamlet  
186 pair. The fluorescence collected from the MAPMT was subsequently demultiplexed to resolve the  
187 temporally multiplexed beamlets while minimizing crosstalk fluorescence in neighboring anodes.

188 We first evaluated the optical performance of the microscope. To check if each beamlet provides  
189 similar excitation and resolution in each sub-area, the point spread function (PSF) of each beamlet was

190 individually measured using fluorescent beads ( $n=7-11$  beads per beam, **Figure 3D, S2**). The optical  
191 performance was similar for each sub-area. Across all sub-areas, the microscope achieved an average PSF  
192 of  $0.9\pm 0.1\mu\text{m}(X)/1.1\pm 0.1\mu\text{m}(Y)$  lateral resolution and  $4.1\pm 0.4\mu\text{m}$  axial resolution, demonstrating sub-  
193 cellular resolution performance. To determine the degree of temporal and spatial cross talk across all 8  
194 beamlets in scattering tissue, a cranial window was implanted in a mouse with virally expressed SpikeyGi  
195 in the primary somatosensory cortex (S1). SpikeyGi fluorescence was measured as a function of cortical  
196 depth for each beam across all detected sub-areas (**Figure 3E**). We observed that crosstalk caused by spatial  
197 multiplexing increased as a function of imaging depth but remained under 10% as far as  $300\mu\text{m}$  below the  
198 pial surface. Crosstalk as a result of temporal multiplexing remained under 5%, independent of imaging  
199 depth. Overall, this demonstrates that the UF2P microscope can achieve large FOV kilohertz frame scan  
200 imaging into deep tissue.

201

### 202 **Self-supervised denoising improves action potential detection below photon shot noise limits**

203 While increasing the effective pulse rate with the UF2P microscope enables imaging FOVs to be increased  
204 while maintaining high frame rate, photon flux is still magnitudes lower than high photon flux regimes.  
205 Assuming a photon flux of  $\sim 0.1 \mu\text{s}$  dwell time per  $\mu\text{m}^2$  voxel, each neuron only receives  $\sim 200$  excitation  
206 pulses per 1ms time bin. Under such imaging conditions, shot noise dominates pixel-wise measurements.  
207 Recently, self-supervised deep learning denoising algorithms have been developed to remove independent  
208 noise sources in calcium imaging data without any ground-truth “clean” (high SNR) measurements (Lecoq  
209 et al., 2021; Li et al., 2021). We expanded upon this approach, developing a deep convolutional neural  
210 network (CNN) to denoise voltage imaging data (DeepVID) (**Figure 4A**). DeepVID combines self-  
211 supervised denoising frameworks that infers the underlying fluorescence signal based on a learned model  
212 of the independent temporal and spatial statistics of the PMT measurements that is attributable to shot noise  
213 (Krull et al., 2018; Lecoq et al., 2021). The CNN was trained to estimate a single center frame ( $N_0$ ) based  
214 on information from prior ( $N_{\text{pre}}$ ) and subsequent ( $N_{\text{post}}$ ) neighboring frames within a time series.  
215 Simultaneously, the CNN was trained to estimate a few “blind” pixels ( $p_{\text{blind}}$ , in %) within the central frame  
216 based on information from all remaining pixels within that frame. Based on the rise time of SpikeyG and  
217 SpikeGi and imaging frame rate of the UF2P microscope, a model with  $N_{\text{pre}}=3$  and  $N_{\text{post}}=3$  was chosen to  
218 maximize inference accuracy while preserving the fast action potential kinetics of the indicators. We first  
219 assessed the frame-to-frame variability in fluorescence signal in the raw data and confirmed that the  
220 fluctuations in each pixel is proportional to the square root of the mean fluorescence (**Figure 4B**), as  
221 expected for shot noise limited signals. DeepVID drastically reduced the frame-to-frame variability,  
222 resulting in a 15-fold improvement in SNR when comparing denoised and raw image data (SNR:  $0.567 \pm$   
223  $0.002$ , raw;  $8.858 \pm 0.027$ , denoised,  $n = 8,000$  pixels) (**Figure 4C**). By breaking this fundamental noise  
224 constraint, the underlying fluorescence signal can be more accurately inferred at individual time points  
225 (**Figure 4D**).

226 To assess how DeepVID improves the reliability of spike detection in voltage imaging data, we  
227 measured neuronal responses using SpikeyGi in S1 during whisker stimulation. Whisker deflections using  
228 air puffs produce well-timed single AP responses in L2/3 S1 neurons (Feldmeyer et al., 2012). Whisker  
229 stimulation was delivered in the form of single or trains of 5 air puffs to the contralateral whisker pad. We  
230 compared raw and denoised fluorescence traces. The reduction in shot noise fluctuations in denoised traces  
231 readily allowed for the identification of potential sensory-evoked and non-evoked spiking events (**Figure**  
232 **4E**). Fluorescence traces were converted into timeseries of SNR levels used for spike detection (**Figure**  
233 **4F**). Denoising appeared to improve the SNR of putative spike events. Analysis of the fluorescence  
234 response (spiking and non-spiking) to single air puffs in denoised vs. raw traces show that peak responses  
235 were increased in denoised traces, owing to better estimates of the baseline fluorescence levels ( $\Delta F/F_0$  raw:  
236  $9.3 \pm 1.0\%$ ; denoised,  $11.1 \pm 0.2\%$ ; Student’s t-test,  $p < 0.001$ ) (**Figure 4G-H**). We compared the percent  
237 of putative sensory-evoked spikes detected at varying SNR thresholds (**Figure 4I**). At low SNR levels ( $<$   
238  $3$ ), the percent of detected spikes was highly overestimated in raw traces whereas the likelihood of false  
239 positives was greatly reduced in denoised traces. In contrast, denoising improved the detection of spikes at  
240 high SNR thresholds ( $> 3$ ) compared to raw traces. Overall, these results demonstrate that reduction in shot

241 noise provided by DeepVID significantly improves the reliability for spike detection in 2P voltage imaging  
242 data.

243

### 244 **Positive-going GEVIs outperforms negative-going GEVIs *in vivo***

245 Using DeepVID, we next compared responses of SpikeyG and SpikeyGi *in vivo* under low photon flux  
246 conditions. Imaging across the full 400 x 400  $\mu\text{m}^2$  FOV, cells were imaged at similar laser power compared  
247 to *in vitro* conditions (~30 mW per beamlet) but at lower resolution (x: 1.0  $\mu\text{m}/\text{pixel}$ , y: 2.1  $\mu\text{m}/\text{pixel}$ ). We  
248 first compared the fluorescent responses to single air puffs (**Figure 5A**). SpikeyGi showed larger peak  
249 responses compared to SpikeyG ( $\Delta F/F_0$ : SpikeyGi,  $11.1 \pm 0.2\%$ ; SpikeyG,  $5.6 \pm 0.1\%$ ; Student's t-test,  $p <$   
250  $0.001$ ). For SpikeyGi, the detection of APs across different SNR thresholds were consistently higher than  
251 SpikeyG repeated measures ANOVA, group interaction:  $F = 407.41$ ,  $p < 0.001$ ) (**Figure 5B**). We further  
252 evaluated the ability to perform population imaging with SpikeyGi using the UF2P microscope. We  
253 simultaneously imaged 129 SpikeyGi neurons across the FOV and could identify sensory-evoked APs  
254 (SNR > 4) across neurons to both single and trains of air puffs (**Figure 5C-D, S3**). We evaluated the  
255 temporal fidelity of SpikeyGi responses to 5-10 Hz trains of the air puff. Since spiking probability to  
256 whisker stimulation can be variable from cell-to-cell in S1 neurons, we generated average traces to detected  
257 APs for each air puff in the stimulus train (**Figure 5E**). At both 5 and 10 Hz stimulation frequencies, the  
258 averaged traces show well isolated spike responses to each air puff within the stimulus train. These results  
259 demonstrate that SpikeyGi in combination with the UF2P microscope is suitable for population-level  
260 voltage imaging.

261

### 262 **Low photon flux enables sustained population-level voltage imaging.**

263 We finally assessed the capacity to perform sustained *in vivo* voltage imaging at low photon flux using the  
264 UF2P microscope. We first tested photobleaching seen SpikeyGi and SpikeyG under *in vitro* high photon  
265 flux conditions. This was performed in a 512 x 512-pixel field of view at 1 Hz with laser power of 35mW.  
266 Intermittent imaging (10s on, 5s off) was performed across 12.5 minutes. Fluorescence was normalized to  
267 the first frame of the recording. SpikeyGi showed little reduction in fluorescent output over the course of  
268 the recording and showed significantly less bleaching than SpikeyG (repeated measures ANOVA group x  
269 time interaction:  $F_{749, 14231} = 2.221$ ,  $p < 0.0001$ ) (**Figure 6A**). Next, we compared photobleaching rates *in*  
270 *vivo* at low photon flux conditions using UF2P microscope under similar intermittent imaging conditions  
271 (9s on, 4s off) across 60 min. For both SpikeyGi and SpikeyG, the fluorescence rapidly decreased by 11-  
272 13% within the first 5 minutes but then more slowly reduced to 22-25% after one hour. Unlike under high  
273 photon flux conditions, no difference in photobleaching was observed between SpikeyGi and SpikeyG  
274 under low photon flux conditions. These results demonstrate that low photon flux excitation benefits both  
275 positive- and negative-going indicators. For SpikeyGi, we assessed the action potential (AP) detection rate  
276 to air puff stimulation across the one hour of imaging (**Figure 6B-C**). Despite the changes in fluorescence,  
277 no differences in action potential detection were observed across the period.

278 Given that the UF2P microscope delivers a total of 240mW across 8 beams (30mW per beamlet)  
279 during *in vivo* imaging, we tested for signs of photodamage or toxicity after 1 hour of sustained imaging  
280 (Podgorski and Ranganathan, 2016). Animals were perfused 16 hours after imaging, and immunostaining  
281 was performed for four markers of tissue damage and inflammation: astrocytic (anti-GFAP), microglial  
282 (anti-Iba1), heat shock (anti HSP-70/72), and apoptotic pathway activation (anti-Caspase-3). We measured  
283 average fluorescence levels in the laser-exposed areas of the cortex and in control areas of the cortex which  
284 were not exposed to laser scanning (**Figure 6D**). We found that laser exposure did not produce an increase  
285 in any of the four markers of photodamage. There was no significant difference between laser-treated and  
286 control areas of the cortex for all four markers (paired Student's t-test,  $n=4$ : GFAP,  $t = 2.27$ ,  $p = 0.11$ ; Iba1,  
287  $t = 0.06$ ,  $p = 0.95$ ; HSP,  $t = 1.75$ ,  $p = 0.18$ ; Caspase-3,  $t = 0.39$ ,  $p = 0.72$ ). In summary, low photon flux  
288 imaging using UF2P microscope in combination with SpikeyGi provides safe and sustained population-  
289 level voltage imaging.

290

291

## 292 DISCUSSION

293 Here we developed a novel, multidiscipline approach to chronically record fast voltage transients from large  
294 sets of neurons in deep brain tissue in behaving animals. The performance gains of the system are possible  
295 by the combination of three independent novel advances; a high performing, positive-going, fast, voltage  
296 indicator (SpikeyGi), an ultra-fast, large FOV multiphoton microscope and a purpose-built AI denoising  
297 process (DeepVID). With these innovations we demonstrate sustained large-scale, ultra-fast, two-photon,  
298 voltage imaging for the first time.

299 Our approach uses a positive fluorescence-voltage slope relationship GEVI (SpikeyGi). During its  
300 characterization *in vitro* under high photon flux illumination, Spikey Gi and its “negative going” counterpart  
301 (SpikeyG) showed similar SNR performance. However, under the low photon flux imaging conditions of  
302 our UF2P microscope, SpikeyGi significantly outperforms its "negative-going" counterpart. While we have  
303 not yet pursued the basis for this difference, we hypothesize reduced baseline noise and the higher photon  
304 count during action potentials combined in SpikeGi result in significantly improved SNR. This indicates  
305 that *in vitro* characterization is not the best predictor of *in vivo* performance, but rather an approach which  
306 combines probe and imaging method engineering is likely to be more successful.

307 In the study, we utilize temporal and spatial multiplexing to develop the UF2P microscope. By  
308 increasing the effective pulse rate of the excitation source while maintaining low detection cross talk, the  
309 UF2P microscope can achieve kilohertz frame scanning in deep tissue at twice the FOV of current kilohertz-  
310 scanning two-photon systems (**Table 1**). The FOV size and imaging depth are comparable to standard 2P  
311 microscopes performing calcium imaging at very low speed. This inherently results in lower photon flux  
312 per imaged neuron. Low photon flux excitation results in reduced photobleaching and photodamage,  
313 enabling sustained and chronic voltage imaging. However, it is challenging to achieve reliable  
314 fluorescence imaging under shot noise limiting conditions.

315 To improve imaging at low photon flux levels we developed a self-supervised, deep learning  
316 denoising method (DeepVID). DeepVID denoising was achieved without sacrificing spatial or temporal  
317 resolution and without access to “ground-truth” high-SNR measurements. It achieved a 15-fold increase in  
318 the single-pixel SNR, which is comparable to the improvements reported in 2P calcium imaging (Lecoq et  
319 al., 2021; Li et al., 2021). Applying DeepVID to sensory-evoked measurements revealed more reliable  
320 spike detections.

321 The combination of these tools represents a new direction of further technology development to  
322 scale up two-photon voltage imaging. For the UF2P microscope, FOV can be further increased while  
323 maintaining overall photon budget levels by a combination of additional judiciously placed spatially  
324 multiplexed beamlets to increase the effective repetition rate and beam shaping to improve excitation  
325 efficiency (Demas et al., 2021; Weisenburger et al., 2019). Ongoing developments in denoising can further  
326 reduce the photon flux needed for reliable detection. The denoising performance of DeepVID can be  
327 improved by incorporating more advanced network architectures, such as spatiotemporal convolution and  
328 attention module (Vaswani et al., 2017). Improvements in SpikeyGi can further reduce photon flux  
329 requirements by increasing fluorescence response amplitude to membrane potential changes, decreasing  
330 resting fluorescence to reduce background, and improving subcellular localization to reduce inactive  
331 SpikeyGi molecules. Overall, low-photon flux imaging pushes the boundaries for monitoring neuronal  
332 activity across spatial and temporal scales. Additionally, this framework can be adopted for other *in vivo*  
333 imaging applications that track signal changes in molecules of low abundance across large areas at fast  
334 temporal resolutions.

## 335 ACKNOWLEDGEMENTS

336 We thank K Khait for assistance in Scope software development; N Manjrekar for assistance in  
337 photodamage experiments; Pieribone Laboratory scientific staff J. Wojciekofsky, L. Delgado, and P.  
338 O’Brien for technical assistance; the Pierce Laboratory Instrument shop including J. Buckley, A. Wilkins,  
339 T. D’Alessandro, and A. DiRubba for help with instrumentation. This work was supported by grants from  
340 a NARSAD Young Investigator Grant from the Brain & Behavior Research Foundation (J.L.C.), the  
341 Richard and Susan Smith Family Foundation (J.L.C.), Elizabeth and Stuart Pratt Career Development

343 Award (J.L.C.), the Whitehall Foundation (J.L.C.), NSF Neuronex Neurotechnology Hub NEMONIC  
344 #1707287 (J.L.C.), NIH New Innovator Award DP2NS111134 (J.L.C.), NIH BRAIN Initiative Awards  
345 R01NS109965 (J.L.C.), UF1NS107705 (J.L.C. and V.A.P.), R21EY030016 (L.T.), U01NS103517 (V.A.P.),  
346 U01NS090565 (V.A.P.), and DARPA N6600117C4012 (V.A.P.), and N660119C4020 (V.A.P.).

347

#### 348 **AUTHOR CONTRIBUTIONS**

349 J.L.C. and V.A.P. initiated and supervised the study. J.P. engineered SpikeyG and SpikeyGi. J.P. carried  
350 out cell culture experiments and analyzed data. X.Y. designed, built, and characterized the ultra-fast two-  
351 photon microscope. C.L. developed DeepVID algorithm and analyzed performance. A.M.A. performed  
352 animal surgeries for slice and *in vivo* experiments. A.M.A. performed slice experiments and analyzed the  
353 data. X.Y. and A.M.A. performed *in vivo* experiments. X.Y., A.M.A., and J.L.C. analyzed *in vivo* data.  
354 I.A.C., I.G.D., L.T., V.A.P., and J.L.C. provided input and guidance. J.P., X. Y., A.M.A., C.L., L.T., V.A.P.,  
355 and J.L.C. prepared the manuscript.

356

#### 357 **MATERIALS AND METHODS**

358 **Plasmid construction.** The starting constructs used in this study, pcDNA3.1/Puro-CAG-ASAP3b and  
359 pcDNA3.1/Puro-CAG-ASAP3b-Kv2.1, were a generous gift from Michael Z. Lin (Villette *et al.*, 2019).  
360 The identification of the expressing cells during automated functional screening (see below) was facilitated  
361 with the addition of a self-cleaving T2A peptide sequence (GSGEGRGSLLTCGDVEENPGP) followed by  
362 nuclear-localized tag-FPs (mCherry) at the C-terminus of GEVI ASAP3. For neuronal expression, GEVI  
363 variants SpikeyG and SpikeyGi were subcloned into the pAAV-hSyn-eGFP (Addgene #50465) by  
364 replacing eGFP using KpnI and NheI restriction sites. Additionally, a fusion of the C-terminal  
365 cytoplasmatic segment of the Kv2.1 channel (the 65AA long proximal restriction and clustering signal) to  
366 the C-terminus of the GEVI variants via the GSSGSSGSS linker facilitated restricted expression targeted  
367 to the neuronal soma and proximal dendrites (Villette *et al.*, 2019). All constructs were manufactured using  
368 InFusion Cloning System (Clontech, USA), with all the products confirmed by sequencing (Keck DNA  
369 Sequencing Facility, Yale).

370

371 **Virus production.** AAV2/PhP.eB-hSyn-SpikeyGi-Kv2.1 ( $9.7 \times 10^{12}$  gc/mL) was obtained from Boston  
372 Children's Hospital Viral Core. AAV2/8-hSyn-SpikeyGi-Kv2.1 ( $1.0 \times 10^{10}$  gc/mL) and AAV2/8-hSyn-  
373 SpikeyG-Kv2.1 ( $1.0 \times 10^{10}$  gc/mL) were produced and purified in the house using an established protocol  
374 (Challis *et al.*, 2019) and commercial purification and titration kits (Takara Bio, USA).

375

376 **Library production.** The production of GEVI site-directed mutagenic libraries was described previously  
377 (Platisa *et al.*, 2017, 2020). Briefly, the mutagenic PCR reaction was run with a mix of the three forward  
378 primers containing three degenerative codons (NDT, VHG, or TGG) and the single reverse primer. This  
379 combination of degenerative primers resulted in site-directed mutagenic libraries encoding all 20 amino  
380 acids with repeats for two amino acids, Lysine and Valine. The insertional library that resulted in the  
381 development of the SpikeyGi was produced with a single set of PCR primers with the forward primer  
382 containing degenerative codon NNK targeted between ASAP3 amino acid residues D151 and N152  
383 (Villette *et al.*, 2019). The 15bp long overlapping extension with a sequence identical to a vector at the  
384 insertion site in forward primers facilitated vector circularization. For the PCR reaction, we used  
385 CloneAmp™ DNA polymerase, and the parent template was removed with *DpnI* restriction enzyme  
386 digestion. For the ligation of the amplified mutagenic vectors, we used In-Fusion HD enzyme premix and  
387 for bacterial transformation Stellar Chemically competent cells (Clontech, USA). The mutagenic libraries  
388 were produced in the 96- well plate with 46 bacterial colonies selected for each (two libraries per 96-well  
389 plate; four wells were controls). The cDNA was purified using an automated liquid handling robot  
390 (epMotion 5057; Eppendorf, USA), and the library complexity was confirmed by sequencing 10% of  
391 selected colonies.

392



393 **Cell culture.** Functional testing on the semi-automated screening platform was done using spontaneously  
394 spiking HEK cells (kind gift from Dr. Adam Cohen of Harvard University; Park *et al.*, 2013; #CRL-3269,  
395 ATCC, USA) expressing GEVI mutants. The stable expression of NaV 1.3 and KiR 2.1 ion channels creates  
396 spike-like electrical activity in these cells. The cells were cultured in DMEM/F12, 10% FBS, 1% penicillin  
397 (100 U/mL), streptomycin (100 µg/ml), geneticin (500 µg/mL) and puromycin (2 µg/mL) (Sigma-Aldrich).  
398 For simultaneous patch-clamp and imaging GEVI testing, we used HEK 293 cells (# CRL-1573, ATCC,  
399 USA). The cells were kept in Dulbecco's Modified Eagle Medium (DMEM, High glucose; Invitrogen, USA)  
400 supplemented with 10% fetal bovine serum (FBS; Sigma-Aldrich, USA). The cultures were maintained in  
401 a humidified incubator at 37°C in a 5% CO<sub>2</sub> environment, and cells were experimentally used for up to 25  
402 passages. For functional testing, cells were plated either on glass-bottom 96-well black dishes (Cellvis,  
403 USA) or on 12-mm coverslips (Carolina Biological, USA) coated with poly-D-lysine hydrobromide  
404 (Sigma-Aldrich, USA). For transient expression of GEVI variants, we used Lipofectamine 200 (Invitrogen,  
405 USA) at the half of the manufacturer's recommended reagent amount (for DNA 0.1 µg per 96-well or 0.4  
406 µg per 12 mm coverslip in 24-well dish, for Lipofectamine 2000 0.25 µl per 96-well or 1 µl per 24-well).

407  
408 **Functional testing of mutagenic libraries under widefield excitation.** The functional screening of GEVI  
409 mutants is done as previously described (Platisa *et al.*, 2020; Platisa *et al.*, 2017). In short, a semi-automated  
410 screening platform was built around a Nikon Eclipse Ti-E inverted microscope equipped with a Perfect  
411 Focus System and a motorized Prior Proscan II stage (Prior Scientific, Inc., USA). The custom-made  
412 imaging chamber holds 96-well plates under constant temperature (37°C) and humidity during experiments.  
413 For imaging, we used a Nikon Plan Apo 20x 0.75 NA objective (Nikon, Japan), a pE-300 (CoolLED Ltd,  
414 U.K.) light source, and an ORCA Flash 4.0 sCMOS camera (Hamamatsu, Japan). For ASAP-based  
415 constructs (GFP), we used a 470/40 nm excitation filter, 495 nm dichroic mirror, and 525/25 nm emission  
416 filter (# 49002, Chroma Technologies Corp., USA). The nuclear-localized tag protein, mCherry, was  
417 visualized with a 560/40 nm excitation filter, 585 nm dichroic mirror, and 630/75 nm emission filter  
418 (#49008, Chroma Technologies Corp., USA). For field stimulation (Grass S48 Stimulator, USA), we used  
419 a custom-made field electrode and actuator system (Thorlabs, USA) attached to the roof of the imaging  
420 chamber. The image collection, electrical stimulation, and signal detection were done using a custom  
421 application written in LabView (National Instruments, Inc., USA). The fluorescence intensity of nuclear-  
422 localized mCherry was used to identify expressing cells and select for the field of views within each well.  
423 For functional screening, images were collected at 100 fps in 2500 ms long sweeps with a single pulse of  
424 70V 0.5 ms applied at 400 ms from the beginning. The fluorescence signal in each cell in response to field  
425 stimulation was quantified as  $\Delta F/F$ . Each GEVI variant was screened in four separate plates, and the  
426 selection of the best mutants was based on the maximum response amplitude across cells and wells.

427  
428 **Electrophysiology and widefield imaging in HEK293 cells.** For whole-cell patch-clamp experiments,  
429 HEK293 cells were kept in a perfused chamber at 33-35°C (Warner Instruments, USA) with the constant  
430 running bath solution (129 mM NaCl, 4 mM KCl, 1 mM CaCl<sub>2</sub>, 1 mM MgCl<sub>2</sub>, 10 mM D-glucose, and 10  
431 mM HEPES, pH 7.4 and was adjusted to 310 mOsm with sucrose). The 3-5 MΩ glass patch pipettes  
432 (capillary tubing with 1.5/0.75 mm O.D./ID, WPIP, USA) were pulled on a P-97 Flaming/ Brown type  
433 micropipette puller (Sutter Instrument Company, USA). The pipette solution contained 125 mM K-  
434 gluconate, 8 mM NaCl, 0.6 mM MgCl<sub>2</sub>, 0.1mM CaCl<sub>2</sub>, 1 mM EGTA, 4 mM Mg-ATP, 0.4Na-GTP and 10  
435 mM HEPES, pH 7.2 and adjusted to ~290 mOsm. Voltage-clamp recordings in the whole-cell configuration  
436 were performed using MultiClamp 700B amplifier, digitizer Digidata Series 1400A and pClamp software  
437 (Molecular Devices, USA). Depending on the experiment, the voltage was changed from a holding potential  
438 of -70mV to i) +30 mV (a single-step depolarization experiments), ii) -110, -90, -50, -30, -10, 10, and 30mV  
439 (in a series of 20mV incremental subsequent steps), or iii) -120, -20, +30 and +80 mV (a series of steps).  
440 Imaging was performed on an Olympus BX61WI upright microscope using a LUMPlan FL 40x N.A. 0.80  
441 water immersion objective (Olympus, USA) and a 488 nm 50 mW laser light excitation (DL488-050, USA).  
442 We used a GFP filter set, a 495 nm dichroic mirror, and a 520/35 nm emission filter (Semrock, USA), and  
443 the laser power measured at the preparation was 13-18 mW/mm<sup>2</sup>. Additionally, the light intensity was

444 adjusted for each recording session using a continuous circular neutral density filter (ThorLabs, Inc., USA)  
445 to the minimum required to record optical signals. The images were collected with a fast-speed NeuroCCD  
446 camera controlled by NeuroPlex software (RedShirt Imaging, USA) at a frame rate of 500 or 1000Hz. For  
447 the image demagnification, we used either an Optem zoom system A45731 0.13 or Optem C-to-C mount  
448 25-70-54 0.383 (Qioptiq LINOS, USA).

449  
450 **Widefield imaging analysis.** The data were analyzed using NeuroPlex, Excel, and custom scripts written  
451 in Igor and Matlab. All the results are presented as a mean value and the standard error of the mean (s.e.m.).  
452 The values for the resting fluorescence and the bleaching rate were derived from recordings on the screening  
453 platform. The resting fluorescence was calculated as the mean value recorded across all the cells within the  
454 field of view at the first five frames at the beginning of the recording and prior stimulation. The bleaching  
455 rate is calculated as a percent change between resting fluorescence at the beginning and end of the trial.  
456 The optical traces are spatial averages of the intensity of the pixels within the region of interest (ROI) that  
457 covers the cell body. The ROIs were visually identified using the Neuroplex feature Frame Subtraction.  
458 The amplitude of fluorescence change was measured as the difference between the averaged values for 50  
459 frames before stimulation and 5 (for SpikeyGi) and 100 (ASAP3 and SpikeyG) frames around the peak of  
460 the response. Data are presented as the voltage-dependent change in fluorescence divided by the resting  
461 fluorescence,  $\Delta F/F$ . For bleach correction, the portion of the trace outside the stimulus was fitted with a  
462 double exponential curve.

463  
464 **Animal preparation.** All experimental procedures were approved by the Institutional Animal Care and  
465 Use Committee for the Charles River Campus at Boston University. For *in vitro* slice experiments, viral  
466 injections were performed in neonatal (P7-P9) C57Bl/6 mice. Mice were bred in house in the Boston  
467 University animal care facility, with standard housing, a 12-hour light/dark cycle, and *ad lib* access to food  
468 and water. Pups were removed from the mother, anesthetized with 1-3% isoflurane, and placed in a custom  
469 stereotaxic holder for neonatal mice. A small incision was made in the scalp and a two small holes were  
470 made with a 30-gauge needle in the skull of the left hemisphere. Mice were injected with AAV2/8-hSyn-  
471 SpikeyGi-Kv2.1 or AAV2/8-hSyn-SpikeyG-Kv2.1 (300 nL) at 250  $\mu\text{m}$  below the pial surface. Incisions  
472 were closed with Vetbond Tissue Adhesive (3M), and animals were treated post-operatively with  
473 buprenorphine (0.05-1 mg/kg, s.c.). Animals were returned to their mother immediately after surgery and  
474 weaned at 3 weeks of age.

475 For *in vivo* experiments, adult (6-8 week old) C57Bl/6 mice, stereotaxic viral injections of GEVIs  
476 were performed in L2/3 and L5 of primary somatosensory cortex, 300 and 500  $\mu\text{m}$  below the pial surface  
477 (600 nL total volume). Either AAV2/PhP.eB-hSyn-SpikeyG-Kv2.1 (1:8 or 1:12 in saline) or AAV2/8-  
478 hSyn-SpikeyG-Kv2.1 were injected. There were two injection sites per mouse, both targeting the left  
479 hemisphere sensorimotor (S1) cortex (AP -1.1 mm, ML 2.9 mm and AP -1.1 mm, ML 3.3 mm). To enable  
480 optical access, a 4 mm cranial window was implanted over S1 (Margolis et al., 2012). A metal headpost  
481 was implanted over the right hemisphere to enable head fixation. Animals were treated post-operatively  
482 with buprenorphine (0.05-1 mg/kg, s.c.) and given 2-3 weeks for viral expression to take place. Animal  
483 were handled and habituated to head fixation for 3-5 days before imaging experiments began.

484  
485 **Slice electrophysiology.** For *in vitro* characterization of GEVIs, whole-cell slice electrophysiology was  
486 performed on layer 2/3 cortical neurons. To obtain brain tissue slices, mice were deeply anesthetized with  
487 ketamine/xylazine and transcardially perfused with modified ACSF (in mM, 124 NaCl, 75 sucrose, 10  
488 glucose, 2.5 KCl, 1.25  $\text{NaH}_2\text{PO}_4$ , 25  $\text{NaHCO}_3$ , 1.3 ascorbic acid, 0.5  $\text{CaCl}_2$  and 7  $\text{MgCl}_2$ ). Brain tissue was  
489 sliced into 300  $\mu\text{m}$  coronal sections and maintained with oxygenated (95/5%  $\text{O}_2/\text{CO}_2$ ) ACSF (in mM, 124  
490 NaCl, 26  $\text{NaHCO}_3$ , 20 sucrose, 3 KCl, 1.25  $\text{NaH}_2\text{PO}_4$ , 2  $\text{CaCl}_2$  and 1.5  $\text{MgCl}_2$ ). Pipettes were pulled from  
491 thin-walled borosilicate capillaries without filament (3-6 M $\Omega$ ) (Sutter Instruments), and filled with internal  
492 solution containing (in mM, 135 K-gluconate, 10 HEPES, 2  $\text{MgCl}_2$ , 2 MgATP, 0.4 EGTA, 0.5  $\text{Na}_3\text{GTP}$ , 10  
493 phosphocreatine disodium). The process of approaching the cell, sealing onto the membrane, and breaking  
494 in to establish a whole-cell configuration was controlled by Autopatcher (Neuromatic Devices). Electrical

495 signals were recorded with a Multiclamp 700B amplifier (Axon Instruments), filtered at 10 kHz and  
496 digitized at 20 kHz (National Instruments PCI-6321), and recorded with custom MATLAB software  
497 (Mathworks). Simultaneous 2P imaging was performed at with a conventional 2P microscope (Ultima,  
498 Prairie Technologies, Middleton WI) using a 40x/0.8NA water immersion objective (Olympus) and Dodt  
499 contrast imaging. For laser source, a 80Mhz Ti:sapphire laser (Mai Tai HP, Spectra Physics) was tuned to  
500 920nm with 35-45mW delivered at the sample.

501 For characterization of fluorescence responses to varying membrane potentials, fluorescence  
502 intensity was measured while neurons were held in voltage clamp mode. One-second trials consisted of a  
503 200ms baseline period at resting membrane potential (-70 mV), followed by a 400 ms voltage step, then a  
504 return to resting membrane potential for 400ms. Trials were repeated 10 times across 10 voltage steps  
505 ranging from -130 mV to +50 mV (20 mV increments). For image acquisition, frame scans of the targeted  
506 cell were acquired at 20Hz across 128 x 85 pixels at ~0.3 $\mu$ m/pixel resolution and 2.8 $\mu$ s pixel dwell time.  
507 For analysis, the cell membrane was segmented by isolating pixels 1.3-2.0x above background. For  
508 characterization of action potential responses, neurons were recorded in current clamp mode with single  
509 action potentials evoked at 100ms intervals (triggered by 10ms pulses of 800-1200 pA), with 10 500-ms  
510 sweeps of 5 action potentials each. Fluorescent responses were recorded by line scans along the cell  
511 membrane at 24-54 pixels per line, scanned at 3-5 kHz, 2.8 $\mu$ s pixel dwell time.  $\Delta F/F_0$  was calculated where  
512  $F_0$  corresponded to fluorescence at resting membrane potential.

513

514 **Microscope design.** The optical design was performed using Zemax OpticStudio software (Zemax LLC),  
515 and the opto-mechanical design was performed using AutoDesk Inventor (Autodesk Inc.). A 920nm, 2W  
516 fiber laser (ALCOR-920, Sparks Lasers, 100fs pulse duration, 31.25MHz repetition rate) was used as the  
517 light source. The total laser power was controlled by a Pockel's Cell (350-80, ConOptics). The laser beam  
518 was split into 4 beam paths using polarizing beamsplitter (PBS) cubes (PBS123/ CCM1-PBS253, Thorlabs).  
519 A half-wave plate (AHWP05M-980, Thorlabs) was placed before each beamsplitter cube (three in total) to  
520 allow power control of individual paths. Two half-wave plates were mounted on manual rotation mounts  
521 (CRM1PT/M, PRM05/M, Thorlabs) The third half-wave plates mounted on a motorized precision rotation  
522 stage (PRM1/MZ8, Thorlabs) for remote control when selecting between 8 beam and 1 beam imaging.  
523 Temporally multiplexed beams were delayed by 8ns relative to each other using delay lines. After the delay  
524 line, all beams were reduced to obtain a 1.5mm beam diameter (BE052-B, AC127-075-B, ACN127-025-B,  
525 or BE02-05-B, Thorlabs).

526 Temporally multiplexed beams were routed into customized beamsplitter plates. Beamsplitter  
527 plates serve two functions. First, they split each temporally multiplexed beam into pairs of spatially  
528 multiplexed beams. Second, they arrange the beamlets linearly to definite the position of each subarea. A  
529 beamsplitter plate consisted of an assembly of half-wave plates (AHWP05M-980, Thorlabs) on rotation  
530 mounts (PRM05/M, Thorlabs), PBS cubes (PBS123, PBS053, Thorlabs) and half-inch gold-coated mirrors  
531 (PF05-03-M01, Thorlabs) on miniature mirror holders (LMMH-12.7R-N, OptoSigma). One beamsplitter  
532 routed 4 beams through independent  $f=100$ mm relay lenses (KPX034AR.16, Newport) which were held in  
533 a customized lens holder and separated by 8.5mm, corresponding to 100 $\mu$ m spacing at the sample. Two  
534 beamsplitter plates were used to combine a total of 8 beams using a 2-inch PBS cube (PBS513, Thorlabs)  
535 and positioned such that beams from each beamsplitter plate were interleaved at 50 $\mu$ m spacing at the sample.  
536 A beam blocker mounted onto a linear actuator (L12-P, Actixon) was placed after each lens holder and  
537 allowed selection between all 8 beams or any arbitrary individual beam.

538 All 8 beamlets were sent to a customized  $f=330$ mm scan lens assembly (SLB-50-300N, SLB-50-  
539 450P, SLB-50-250P, OptoSigma), and conjugated to a 2kHz resonant scanner (CRS 12kHz, 5.0mm x  
540 7.2mm aperture, Cambridge Technology) and galvo scanner (6215H, Cambridge Technology). The scan  
541 lens (S4LFT0089/094, Sill Optics GmbH & Co.) and tube lens (AC508-500-B, AC508-750-B, Thorlabs)  
542 expanded the beam to fill the back aperture of the objective (N16XLWD-PF, 16x, Nikon). The laser light  
543 was reflected to the objective by a short-pass filter (FF01-720/SP-25, AVR Optics).

544 The emitted light passed through the short-pass filter and then was separated by a secondary  
545 dichroic (FF556-SDi01-40x45, Semrock) into green and red fluorescent channels. Red fluorescence excited

546 from a single beam was detected using an achromatic lens (AC508-080-A, Thorlabs) and an eyepiece  
547 (19mm, Televue) focused onto a hybrid PMT (R11322U-40, Hamamatsu). For green fluorescence, a  
548 customized lens assembly was used to magnify and reshape the square FOV to match the geometry of a  
549 16x1 multi-anode photomultiplier (H13123, GaAsP 16-channel MAPMT, Hamamatsu). The assembly  
550 included two achromatic lenses (AC508-100-A, Thorlabs) and two cylindrical lenses (LJ1567RM-A,  
551 Thorlabs, and CKX019, Newport) positioned orthogonal to each other.

552 Using a customized 16-to-4 adder (Marina Photonics Inc.), signals from the 16 MAPMT anodes  
553 were amplified, digitized, and then combined into four detector subgroups each consisting of signals from  
554 4 adjacent anodes. Using custom electronics, the subsequent LVPECL signal was converted and fanned out  
555 to two LVDS signals (NB6N11S, ON Semiconductor). The signals were collected by an FPGA (PXIe-  
556 7965R, National Instruments Corp.) with a 20-channel digital I/O board (NI-6587, National Instruments  
557 Corp.) operating at 1Gbit/s sampling rate. For a given detector subgroup, the two fanned out signals were  
558 inputted into two I/O channel wherein one of the two fanned out signals was delayed by 0.5ns. This  
559 provided a 2Gbit/s sampling rate for each detector subgroup when combined on the FPGA.

560 Each detector subgroup contained fluorescence from two beamlets which were then temporally  
561 demultiplexed on the FPGA using a synchronization signal provided by the laser and electronic delay box  
562 (DB64, Stanford Research Systems) providing de-multiplexing with 0.5ns precision. Additional time-  
563 dependent gating was implemented on the FPGA to minimize spatial multiplexed crosstalk from  
564 neighboring detector subgroups (LabVIEW, National Instruments). For sample positioning, a lifting stage  
565 (HT160-16-DC, Steinmeyer Mechatronik GmbH) mounted on an XY stage (KT310-200-DC, Steinmeyer  
566 Mechatronik GmbH) was used. The microscope system was controlled by a customized C++-based  
567 software, Scope. The software controlled the resonant and galvo scanner (imaging FOV), the pockel's cell  
568 (laser power) and the shutter through a DAQ module (PXI-6259, National Instruments Corp.).

569  
570 **Point spread function characterization.** For each beamlet in the UF2P microscope, the point spread  
571 function (PSF) was measured using 0.5 $\mu$ m diameter fluorescent beads with (T7281, Invitrogen). Images  
572 were taken one beamlet at a time. The beads were embedded in 1.5% agarose and an image stack of the  
573 bead was taken at 0.1x0.1x0.5 $\mu$ m<sup>3</sup> voxel resolution with 50 frames at each plane. Motion correction was  
574 performed at each plane before averaging. A summed Z-intensity projection of the image stack was taken  
575 and the maximum intensity pixel was identified as the center of the bead along the X/Y-axis. The center  
576 along the Z-axis was defined as the plane with the maximum total signal. The profile was plotted through  
577 the center along each axis. The PSF value reported was the full-width-at-half-maximum (FWHM) of each  
578 profile.

579  
580 **Crosstalk characterization.** To determine the degree of temporal and spatial crosstalk observed in  
581 scattering tissue, a mouse virally expressing SpikeyGi implanted with a cranial window was used. Tissue  
582 was scanned using one beam at a time (~30mW) and fluorescence was collected across all 8 subareas.  
583 Images consisting of 50-frame averages acquired at 389Hz were taken at 30 $\mu$ m steps from 0- 300 $\mu$ m below  
584 the pial surface. For the excited subarea in each image, pixels corresponding to SpikeyGi fluorescence  
585 were identified as those whose intensities were >95<sup>th</sup> percentile compared to other pixels in the same subarea.  
586 Percent crosstalk was calculated as the mean signal measured in each of the non-excited subareas divided  
587 by the mean signal in the excited subarea contain SpikeyGi fluorescence.

588  
589 **Intrinsic signal optical imaging.** To identify the location of viral expression relative to S1, intrinsic signal  
590 imaging was performed under light anesthesia (1-1.5% isoflurane). The cortical surface was illuminated  
591 with a 625 nm LED (Thor Labs), and two individual whiskers (B2 or C2) were stimulated at 10 Hz with a  
592 piezo-electric stimulator. Reflectance images were recorded using a f = 25 mm lens (Navitar) and a CMOS  
593 camera with a 30 Hz frame rate, 6.5  $\mu$ m pixel size, 4 x 4 binning, and 512 x 512 binned pixels (Hamamatsu).  
594 Cortical activation in the barrel column was determined by comparing changes in reflectance during  
595 whisker stimulation versus periods of non-stimulation, expressed as  $\Delta R/R_0$  (150 frame average). Barrel  
596 columns were identified as signal minima after averaging intrinsic reflectance signals over 10 trials.

597

598 **Self-supervised deep learning denoising of voltage imaging data.** DeepVID combines self-supervised  
599 frameworks implemented in DeepInterpolation and Noise2Void (Lecoq et al., 2021; Li et al., 2021). The  
600 network architecture of DeepVID was based on the DnCNN (Zhang et al., 2017), a fully convolutional  
601 network with residual blocks. This architecture was chosen to better accommodate the 8:1 aspect ratio in  
602 the sub-image scanned by each beamlet. The network was constructed with 2D convolution layers (Conv),  
603 batch normalization (BN) layers and Parametric Rectified Linear Unit (PReLU) activation layers, with 16  
604 repeated residual blocks in the middle. Each residual block contained two 3x3 Conv layers with BN layers  
605 followed, and an PReLU activation layer was appended after the first BN layer. The skip connection was  
606 added to link low dimensional and high dimensional features by adding the feature map of the input and  
607 the output for each residual block (**Figure 4A**).

608 DeepVID was designed to denoise a single frame from each sub-area at a time. It was trained to  
609 predict the central frame  $N_0$  using an input image time series, consisting of  $N_{\text{pre}}$  frames before and  $N_{\text{post}}$   
610 frames after the central frame, in addition to a degraded central frame with several “blind” pixels. A random  
611 set of pixels ( $p_{\text{blind}}$ ) in the central frame were set as blind pixels using a binary mask, whose intensities were  
612 replaced by a random value sampled from randomly selected pixels in the frame. The hyperparameters ( $N_{\text{pre}}$   
613 = 3,  $N_{\text{post}}$  = 3,  $p_{\text{blind}}$  = 10%) were optimized to maintain the temporal dynamic of voltage signal spikes while  
614 recovering a high single-frame spatial resolution. The loss function was the mean squared error (i.e. L2 loss)  
615 between the original and denoised central frame and was calculated only on the blind pixels. The training  
616 was performed using the Adam optimizer with 360 steps per epoch and a batch size of 4. The training  
617 stopped after going over all samples in the data set one time to avoid overfitting. The learning rate was  
618 initialized at  $5 \times 10^{-6}$  and reduced to  $1 \times 10^{-6}$  when the loss on the validation set did not decrease in the past  
619 288,000 samples.

620 The training data set consisted of 1181 videos, each of which contained 1000 frames acquired at  
621 803 Hz. Each image time series was preprocessed by detrending and normalization before sending into the  
622 DeepVID network. For detrending, the trend was approximated by a second order estimator by fitting to  
623 the time trace of the intensity mean of each frame. The scalar in the trend at each frame was subtracted from  
624 all the pixels in the corresponded frame. The detrended video was then normalized by subtracting the mean  
625 and dividing by the standard deviation of all pixels in the image time series. The network was trained on a  
626 graphics processing unit (Nvidia P100, 12 GB VRAM) using TensorFlow 2.2.0, Python 3.8 and CUDA  
627 11.2. Once DeepVID was trained, inference denoising of subsequent image data using the trained model  
628 was performed frame-by-frame by feeding each corresponding 7-frame image time series. It can be  
629 performed at approximately 200 frames per second on a single Nvidia P100 GPU. To quantify the  
630 performance of DeepVID, the single-pixel SNR was defined as the ratio of the mean divided by the standard  
631 deviation of the pixel intensity along the temporal axis.

632

633 ***In vivo* voltage imaging.** To measure sensory-evoked voltage responses, whisker stimulation was  
634 performed on awake, head-fixed mice. Air puffs (25ms) were delivered to the whisker pad contralateral to  
635 the imaged hemisphere. Stimulus patterns consisted of alternating trains of 1 puff or 5 puffs separated at 4  
636 second intervals. Trains of 5 air puffs were delivered at either 5 or 10 Hz stimulus frequency. Using the  
637 UF2P microscope, voltage imaging in S1 was performed 803Hz at frame rate across 400x192 total pixels  
638 (400x24 per subarea) at x: 1.0  $\mu\text{m}/\text{pixel}$ , y: 2.1  $\mu\text{m}/\text{pixel}$  resolution,  $\sim 30\text{mW}$  per beamlet,  $\sim 0.1\mu\text{s}$  dwell  
639 time. For image analysis, each subarea was analyzed independently in MATLAB (Mathworks). For  
640 correction of brain motion, brain motion was estimated using a 2D rigid fast-Fourier transform based on  
641 images from one subarea and then a rigid transform correction was applied to all 8 subareas. Images for  
642 each subareas were then denoised using DeepVID. Neurons were then manually segmented and  
643 fluorescence trace extracted for each ROI.

644

645 **Action potential analysis.** For analysis and detection of spiking-related voltage signals, slow fluctuations  
646 in fluorescence signals for each cell were first removed by baseline subtraction along a moving average  
647 across 2.5 seconds of recordings. Given the  $\sim 5\text{ms}$  rise and  $\sim 12.5\text{ms}$  decay time (peak-to-trough) of tested

648 GEVIs, a putative spike trace was generated by calculating the difference in fluorescence intensity across  
649 every 10<sup>th</sup> imaging frame (12.5ms) across the time series. The putative spike trace was normalized by the  
650 cell's noise level, defined as the mean of the absolute difference between each time point, to produce an  
651 SNR trace. Spikes were identified as transient events exceeding a given SNR threshold. Sensory-evoked  
652 action potentials were identified as detected spikes occurring within a 20 frame window (25ms) following  
653 air puff delivery. The sensitivity of GEVIs for spike detection was assessed by quantifying the percent of  
654 detected action potentials evoked for each air puff across a range of SNR thresholds.

655  
656 **Photobleaching.** For *in vitro* photobleaching measurements, cortical tissue was prepared in the same  
657 manner and imaged using the same setup for slice electrophysiology. Areas of SpikeyGi or SpikeyG  
658 expression were positioned in the field of view using an epifluorescent microscope. Imaging data was  
659 recorded at 1 Hz in an intermittent pattern with 10s on (shutter open) and 5s off (shutter closed) for 12.5  
660 min. Laser power of 35 mW was used, with 1.13  $\mu\text{m}$  per pixel and dwell time of 2.8  $\mu\text{s}$ . ROIs corresponding  
661 to a single cell were extracted manually, and each data point corresponded to the mean fluorescence  
662 intensity in a single frame.

663 *In vivo* photobleaching measurements were performed using the UF2P microscope on awake, head-  
664 fixed mice with implanted cranial windows. Imaging was performed using a total laser power of 240mW  
665 at the sample (30mW per beam). The tissue was scanned at a framerate of 803Hz in an intermittent pattern  
666 consisting of 9s on (shutter open) and 4s off (shutter closed) for 60 min. To assess action potential responses  
667 during photobleaching, voltage imaging with whisker stimulation was performed at 15 minute intervals.  
668 ROIs corresponding to a single cell were extracted manually. Each data point corresponded to the mean  
669 fluorescence intensity of every 20<sup>th</sup> frame across the 9 seconds of imaging. Photobleaching rates were  
670 determined by normalizing all data points to the first data point.

671  
672 **Photodamage.** Animals previously injected with virus and implanted with cranial windows were used for  
673 experiments. A location for laser exposure away from the viral injection sites was selected based on a wide-  
674 field blood vessel map under the cranial window. Each photo-damage session consisted of one-hour of  
675 continuous laser scanning with 240mW total power (30mW per beamlet). Sixteen hours after laser exposure,  
676 animals were anesthetized with 1.5-3.0% isoflurane and cranial windows were removed to expose the  
677 cortex. The blood vessel map was used to locate the laser exposure site, and a lipophilic dye (SP-DiIC<sub>18</sub>(3);  
678 ThermoFisher Scientific; D7777) was injected to mark the four corners of the laser exposure field of view.  
679 Animals were then transcardially perfused with 0.1 M PBS and 4% paraformaldehyde. Brains were  
680 postfixed in 4% paraformaldehyde for 24 hours, transferred to 0.1 M PBS, then were sliced with a vibratome  
681 into 50- $\mu\text{m}$  coronal sections. Slices were first incubated in a blocking solution (10% normal goat serum and  
682 1% Triton X-100) and washed three times in 0.1M PBS. Alternating slices were labeled with sets of primary  
683 antibodies in 5% normal goat serum and 0.1% Triton X-100. One set of slices were stained with primary  
684 antibodies for mouse monoclonal anti-GFAP (G3893; Sigma-Aldrich; 1:1,000 dilution) and rabbit anti-  
685 Iba1 (019-19741; Wako Chemicals; 1:500 dilution). The other set of slices were stained with mouse anti-  
686 HSP70/HSP72 (ADI-SPA-810-D; Enzo Life Sciences; 1:400 dilution), and rabbit anti-cleaved caspase-3  
687 (Asp175) (9661; Cell Signaling; 1:250 dilution). Slices were then washed three times in 0.1 M PBS and  
688 incubated in secondary antibodies. Iba1 and caspase-3 were labelled with goat anti-rabbit Alexa Fluor 555  
689 (Invitrogen, A21429; 1:500 dilution), and GFAP and HSP were labelled with goat anti-mouse Alexa Fluor  
690 647 (Invitrogen, A21235; 1:500 dilution). Slices were washed in 0.1M PBS and mounted with  
691 Fluoromount-G mounting medium (0100-01, SouthernBiotech). The lipophilic dye was used to identify  
692 which sections contained the laser exposure site, and where it was located on the medial-lateral axis. Slices  
693 were imaged with a Nikon ECLIPSE Ni-E microscope and NIS-Elements software (Nikon Instruments).

694 Photodamage was determined increased antibody labeling in the laser exposed region relative to  
695 the corresponding area on the contralateral hemisphere. The relative fluorescence was determined by  
696 dividing the mean fluorescent intensity (a.u.) on the treated hemisphere by mean intensity on the  
697 contralateral hemisphere. Fluorescence was measured in two areas of the cortex, the laser exposure site and  
698 a control area that was at least 1 mm away from the site of laser exposure. The control area was intended

699 to capture protein expression that may have been caused by chronic window implantation and/or virus  
700 injection, but was not caused by laser exposure.

701

702 **Material and data availability.** All sequence information will be available at NCBI, all plasmids and  
703 rAAVs will be available through Addgene and UNC Vector Core. All codes will be available at  
704 <https://github.com/common-chenlab/> and <https://github.com/bu-cisl/DeepVID>

705 **FIGURES**  
706

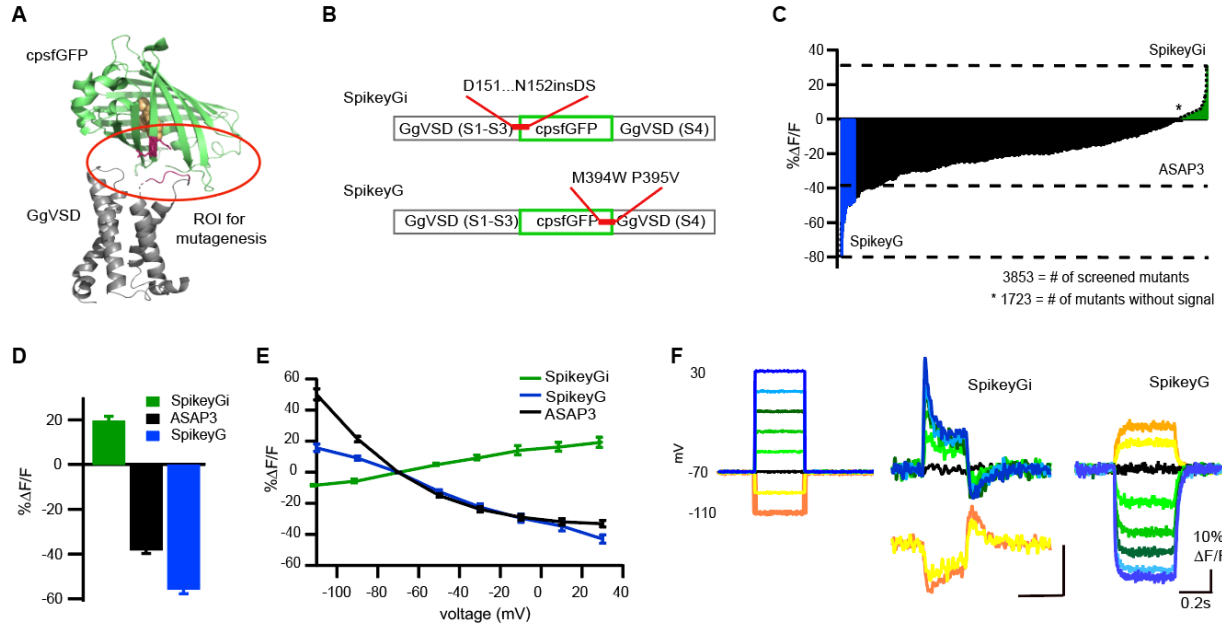

707  
708

709 **Figure 1. Design and functional characterization of green, dual-polarity, 2P compatible GEVIs.** (A)  
710 A model of crystal structure for Spikey G and SpikeyGi based on crystal structures for cpEGFP (PDB 3EVP)  
711 and CiVSD (PDB 4G7Y). The region of interest (ROI) for targeted mutagenesis is labeled with the red  
712 circle. (B) A schematic showing insertion site for pair of amino acids DS between residues D151 and N152  
713 within FP that produced SpikeyGi (upper), and double point mutation M394W P394V within VSD that  
714 produced SpikeyG. (C) Distribution of fluorescence responses of ASAP3 mutants (in black) in response to  
715 field simulation-based functional screening in expressing electrically active HEK293 cells. Positive-going  
716 SpikeyGi variants are shown in green, negative-going SpikeyG variants are shown in blue, and parent  
717 ASAP3 in black. (D) The amplitude of fluorescence response to 300ms 100mV depolarization voltage step  
718 in transiently expressing HEK293 cells of novel GEVIs, SpikeyGi ( $n = 8$  cells) and SpikeyG ( $n = 5$  cells)  
719 vs. parent indicator ASAP3 ( $n = 8$  cells). The color scheme is the same as in [C]. Data are plotted as mean  
720  $\pm$  SEM. (E) V-F curve showing fluorescence response of novel indicators across a range of voltage steps  
721 for SpikeyGi ( $n = 3$  cells), SpikeyG ( $n = 5$  cells), and parent indicator ASAP3 ( $n = 5$  cells). For all cells,  
722 300ms voltage steps of  $-40$  to  $+100$  mV were applied in increments of 20 mV from a resting potential of  
723  $-70$  mV. The color scheme is the same as in [C]. Data are plotted as mean  $\pm$  s.e.m. (F) Example of traces  
724 showing fluorescence response to series of voltage steps recorded from HEK293 transiently expressing  
725 novel indicators, SpikeyGi and SpikeyG.



726

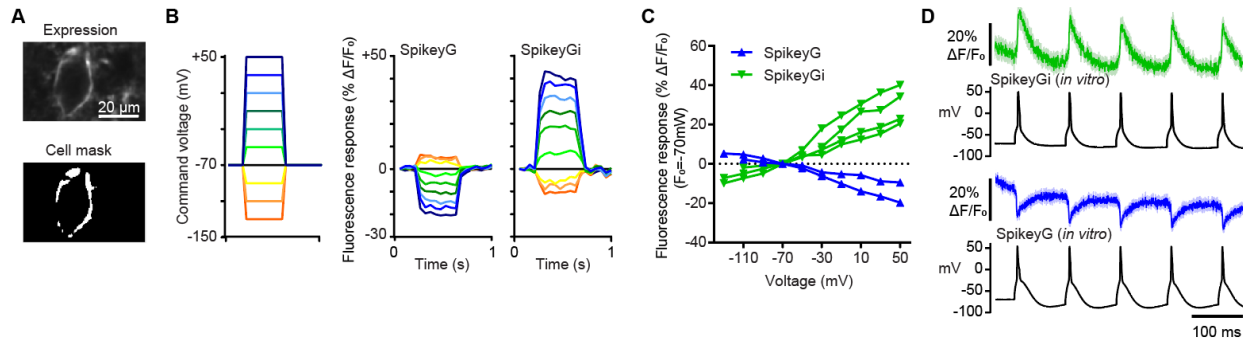

727

728

729

730

731

732

733

734

**Figure 2. *In vitro* performance of SpikeyGi and SpikeyG.** (A) Example of field of view of neuron imaged for slice experiments (top). ROI mask used for image analysis (bottom). (B) Example command voltages applied during voltage clamp mode (left). Corresponding fluorescence responses measured in example SpikeyG and SpikeyGi cells. (C) Fluorescent responses to steady-state voltage steps in slice electrophysiology for individual cells (Normalized to -70 mV; SpikeyG,  $n=2$  cells; SpikeyGi,  $n=4$  cells; 10 trials per step). (D) Fluorescent responses to 10Hz action potential trains evoked by current injection *in vitro* ( $n = 10$  trials). Shaded region; s.e.m.

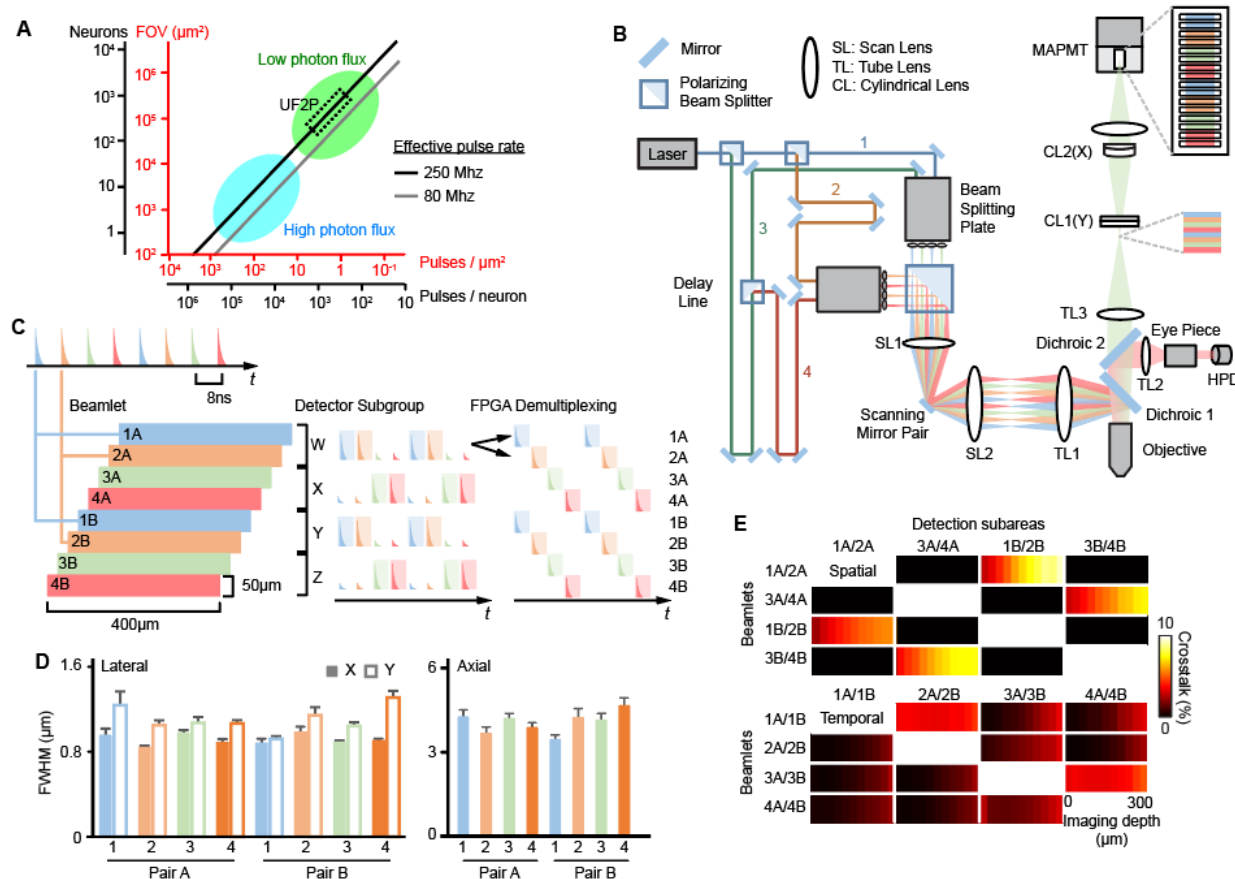

735

736 **Figure 3. Design and performance of ultra-fast two-photon microscope.** (A) Relationship between  
 737 excitation pulses per neuron and total neurons imaged at 1 kHz sampling rate assuming  $1 \mu\text{m}^2$  voxel across  
 738 different effective pulse rates. (B) Schematic of the ultra-fast two-photon microscope. Laser beam was first  
 739 split into 4 beamlets (blue - 1, orange - 2, green - 3, red - 4) using polarizing beam splitters (PBS). Beamlets  
 740 were temporally multiplexed using delay lines and then split into spatially multiplexed beamlet pairs.  
 741 Using two beam splitting plates, beamlets were spatially arranged, combined with a 2-inch PBS into a linear  
 742 arrangement, and projected onto the objective back pupil. Scan and tube lenses were matched to the beam  
 743 diameter between resonant/galvo scanner pair and the size of the objective back aperture. The detection  
 744 path enabled single color imaging with all 8 beamlets or dual color imaging with a single beam. A dichroic  
 745 separated green from red fluorescence. Red fluorescence excited from a single beam was detected with a  
 746 single hybrid PMT. For green fluorescence, cylindrical lenses in the detection path reshaped the collected  
 747 fluorescence to match a linearly arranged  $16 \times 1$  MAPMT detector. Signals from each anode were  
 748 independently collected when imaging using 8 beamlets or summed when excited with a single beam. (C)  
 749 Schematic of detection and demultiplexing algorithm. The 16 anodes on the MAPMT were summed into 4  
 750 detector subgroups (W, X, Y and Z). Each detector subgroup received photons from 2 temporally  
 751 multiplexed subareas that were subsequently demultiplexed using FPGA programmed digital gates (shaded  
 752 area). Additional time-dependent gating was implemented on the FPGA to minimize spatial multiplexed  
 753 crosstalk from neighboring detector subgroups. (D) Lateral and axial PSF measurements for each beamlet.  
 754 ( $n=7-11$  beads per beamlet). Error bar indicates the s.e.m. (E) Average detected crosstalk as a function of  
 755 imaging depth due to spatial multiplexing (top panel) or temporal multiplexing (bottom panel). ( $n=5$   
 756 imaging stacks). See also **Figure S1-S2**.

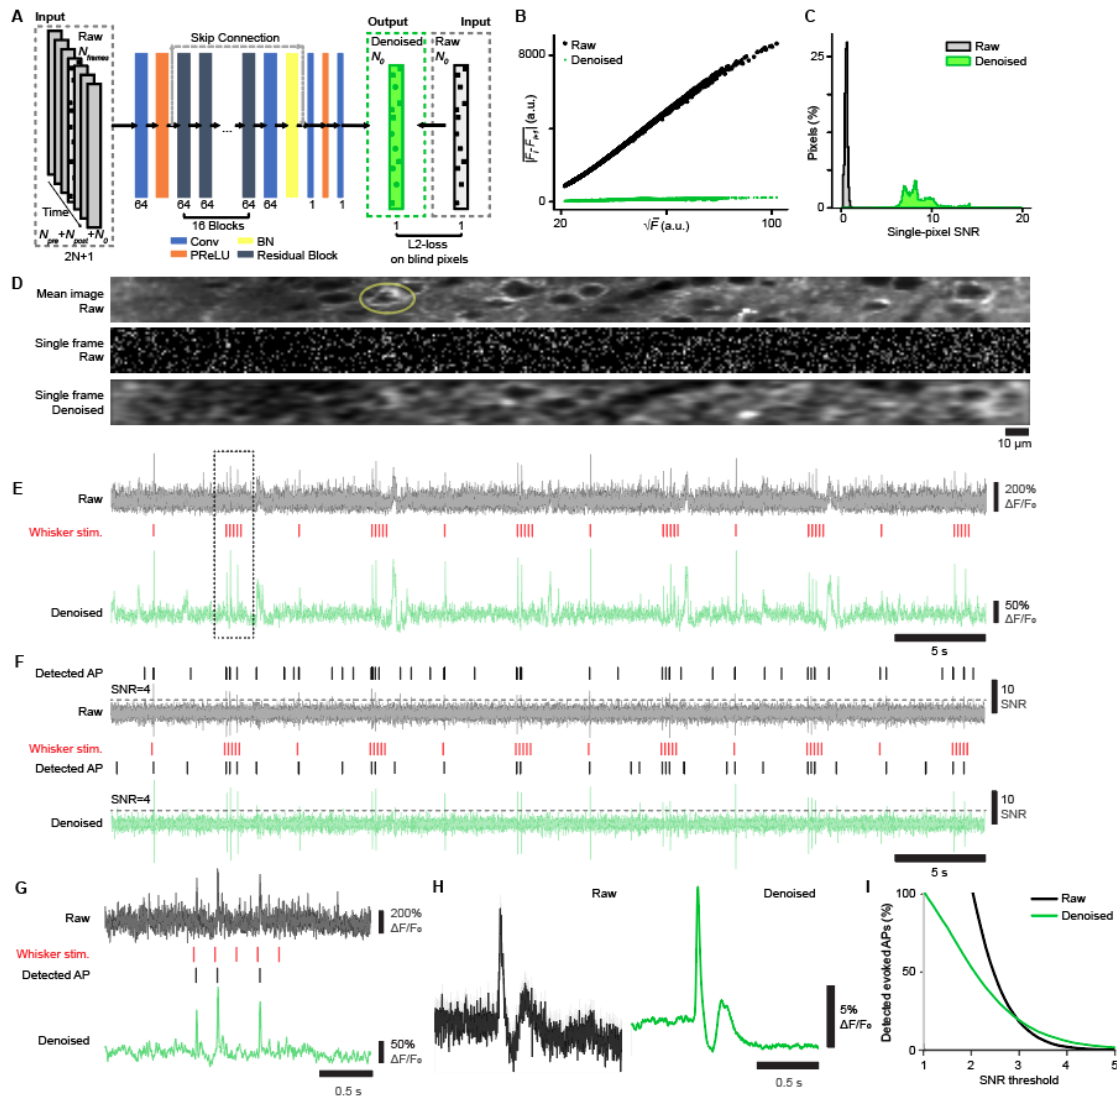

757  
 758 **Figure 4. DeepVID reduces photon shot noise to improve action potential detection.** (A) Training  
 759 strategy and network structure of DeepVID. The voltage signals from blind-spot pixels in the central frame  
 760 ( $N_0$ ) are inferred from the rest of unmasked pixels in the central frame and the neighboring frames ( $N_{pre}$  and  
 761  $N_{post}$ ) in the input image data. DeepVID is a deep convolutional neural network with residual blocks, where  
 762 Conv is 2D convolution, BN is batch normalization, and PReLU is the parametric rectified linear unit.  
 763 (B) Frame-to-frame noise (mean of the absolute intensity difference) as a function of fluorescence signal  
 764 (square-root of the mean intensity) for raw vs. denoised pixels for representative image data.  
 765 (C) Distribution of pixel-level SNR (temporal mean over S.D. for each pixel time series) from a  
 766 representative raw and denoised data. (D) Example of single frame image denoising with DeepVID. Images  
 767 from one subarea acquired with the UF2P microscope. Raw *in vivo* image averaged across 1000 frames  
 768 (top panel) showing SpikeyGi-expressing neurons. Single frame is shown before (middle panel) and after  
 769 denoising with DeepVID (bottom panel). (E) Raw and denoised fluorescence traces from neuron [circled  
 770 in D]. Air puff whisker stimulus are shown. (F) Putative spike events based on SNR levels in raw and  
 771 denoised traces. Detected events at SNR>4 are shown. (G) High temporal resolution view of example raw  
 772 and denoised traces [box in E] showing spike-related fluorescence changes. (H) Average raw and denoised  
 773 fluorescence traces in response to single air puff stimulus. (I) *In vivo* detection of sensory-evoked APs with  
 774 SpikeyGi across SNR thresholds for raw and denoised traces ( $n = 214$  cells, 3 animals). Shaded region in  
 775 E, F, G and H equals S.E.M.

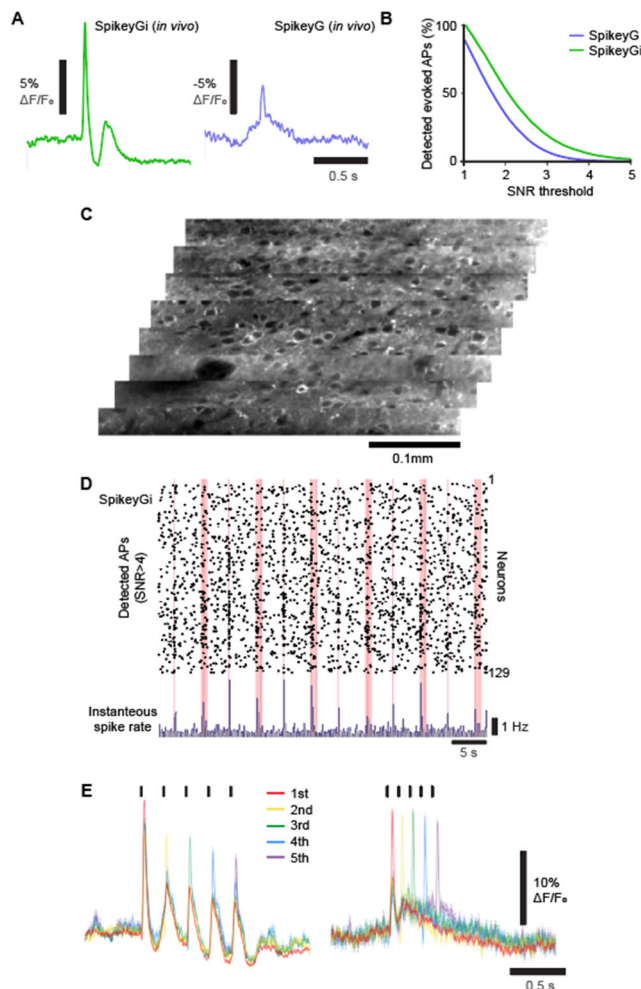

776

777 **Figure 5. SpikeyGi outperforms SpikeyG for *in vivo* two-photon population imaging.** (A) Average raw  
778 and denoised fluorescence traces in response to single air puff stimulus for SpikeyGi and SpikeyG. ( $n =$   
779 214 cells, 3 animals; SpikeyGi, 135 cells, 2 animals; SpikeyG). (B) *In vivo* detection of sensory-evoked  
780 APs across SNR thresholds for SpikeyGi and SpikeyG. (C) Example FOV from UF2P microscope of L2/3  
781 neurons expressing SpikeyGi. (D) Detected *in vivo* spike trains at SNR > 4 for 129 simultaneously imaged  
782 neurons expressing SpikeyGi. Red lines indicate air puffs. Instantaneous spike rate across the population  
783 are shown at the bottom. (E) Average fluorescence responses to detected APs (SNR > 4) for individual air  
784 puffs in 5 Hz (left) or 10 Hz (right) stimulus trains ( $n = 214$  cells, 3 animals, 5 Hz stimuli, and  $n = 206$  cells,  
785 3 animals, 10 Hz stimuli). Shaded region; s.e.m. See also **Figure S3**.

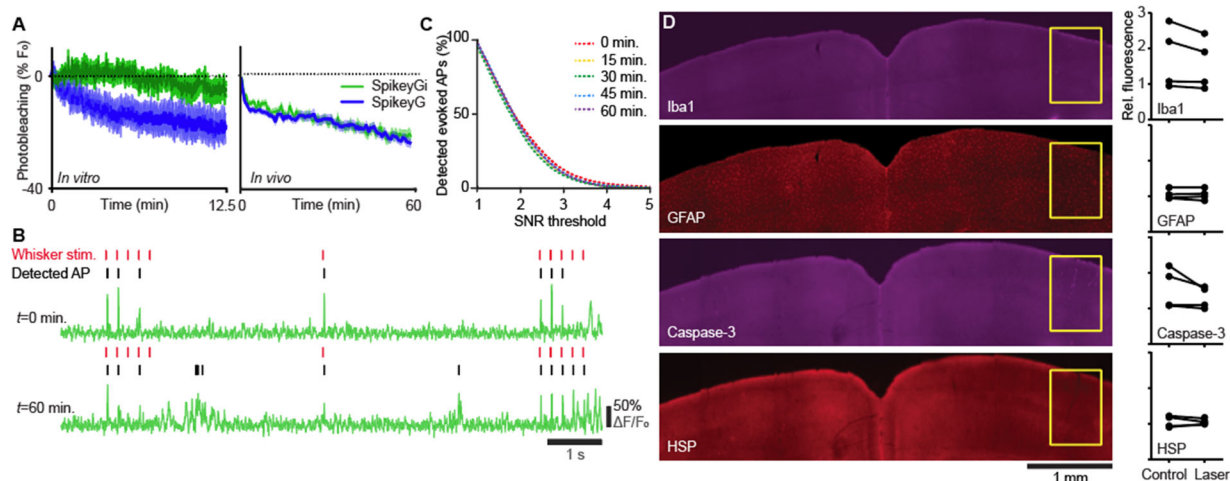

786  
787 **Figure 6. Low photon flux excitation facilitates sustained two-photon voltage imaging.** (A) Left panel  
788 shows *in vitro* photobleaching curves for SpikeyGi and SpikeyG under high photon flux conditions ( $n = 8$   
789 cells, 1 FOV, SpikeyGi; 13 cells, 3 FOV, SpikeyG). Right panel *In vivo* photobleaching curves for  
790 SpikeyGi and SpikeyG under low photon flux conditions ( $n = 33$  cells, 3 FOV, SpikeyGi; 33 cells, 3 FOV,  
791 SpikeyG). (B) Example SpikeyGi fluorescence traces and detected action potentials (SNR>4) of a neuron  
792 across 1 hour of intermittent *in vivo* imaging (9s on, 4s off). (C) *In vivo* detection of sensory-evoked APs  
793 across SNR thresholds for SpikeyGi across one hour of imaging. (D) Left panels show example coronal  
794 sections of immunostained tissue assaying photodamage after one hour of sustained imaging. Yellow box  
795 denotes imaged region. Right panels show relative fluorescence in imaged region compared corresponding  
796 to contralateral region areas across immunostained tissue ( $n = 4$  animals). Scale bar: 1 mm. Shaded region;  
797 s.e.m.

798 **SUPPLEMENTARY INFORMATION**

| <b>Microscope</b>                                        | <b>FACED</b>      | <b>U LOVE</b>           | <b>KHz2P</b>         | <b>SLAP</b>                | <b>UF2P</b>           |
|----------------------------------------------------------|-------------------|-------------------------|----------------------|----------------------------|-----------------------|
| <i>Reference</i>                                         | (Wu et al., 2020) | (Villette et al., 2019) | (Zhang et al., 2019) | (Kazemi pour et al., 2019) | This manuscript       |
| <i>FOV (<math>\mu\text{m} \times \mu\text{m}</math>)</i> | 50x200            | 150x150*                | 700x135              | 250x250                    | 400x400               |
| <i># Foci (Temporal / Spatial)</i>                       | 80 (temp.)        | 1                       | 400 (spa.)           | 4 lines (temp.)            | 8 (4 x 2)             |
| <i>Foci Spacing (<math>\mu\text{m}</math>)</i>           | 0.625             | N/A                     | 15                   | 0.2                        | 50x200 (temp. x spa.) |
| <i>Total avg. power (mW)</i>                             | 75                | 20                      | 280                  | 96                         | 270                   |
| <i>Peak energy (nJ/foci)</i>                             | 0.94              | 0.25                    | 3.5                  | 19.2                       | 0.96                  |
| <i>Laser pulse per voxel</i>                             | 1.1               | 8000                    | 0.4                  | 4.2                        | 2.5                   |
| <i>Effective pulse rate (Mhz)</i>                        | 80                | 80                      | 40                   | 5                          | 250                   |
| <i>Spatial Crosstalk</i>                                 | None              | None                    | High                 | High                       | Low                   |
| <i>In Vivo GEVI Imaging?</i>                             | Yes               | Yes                     | No                   | No                         | Yes                   |

799

800 **Table 1. Comparison of kilohertz-scanning two-photon microscopes.** \*indicates Random access

801 scanning.

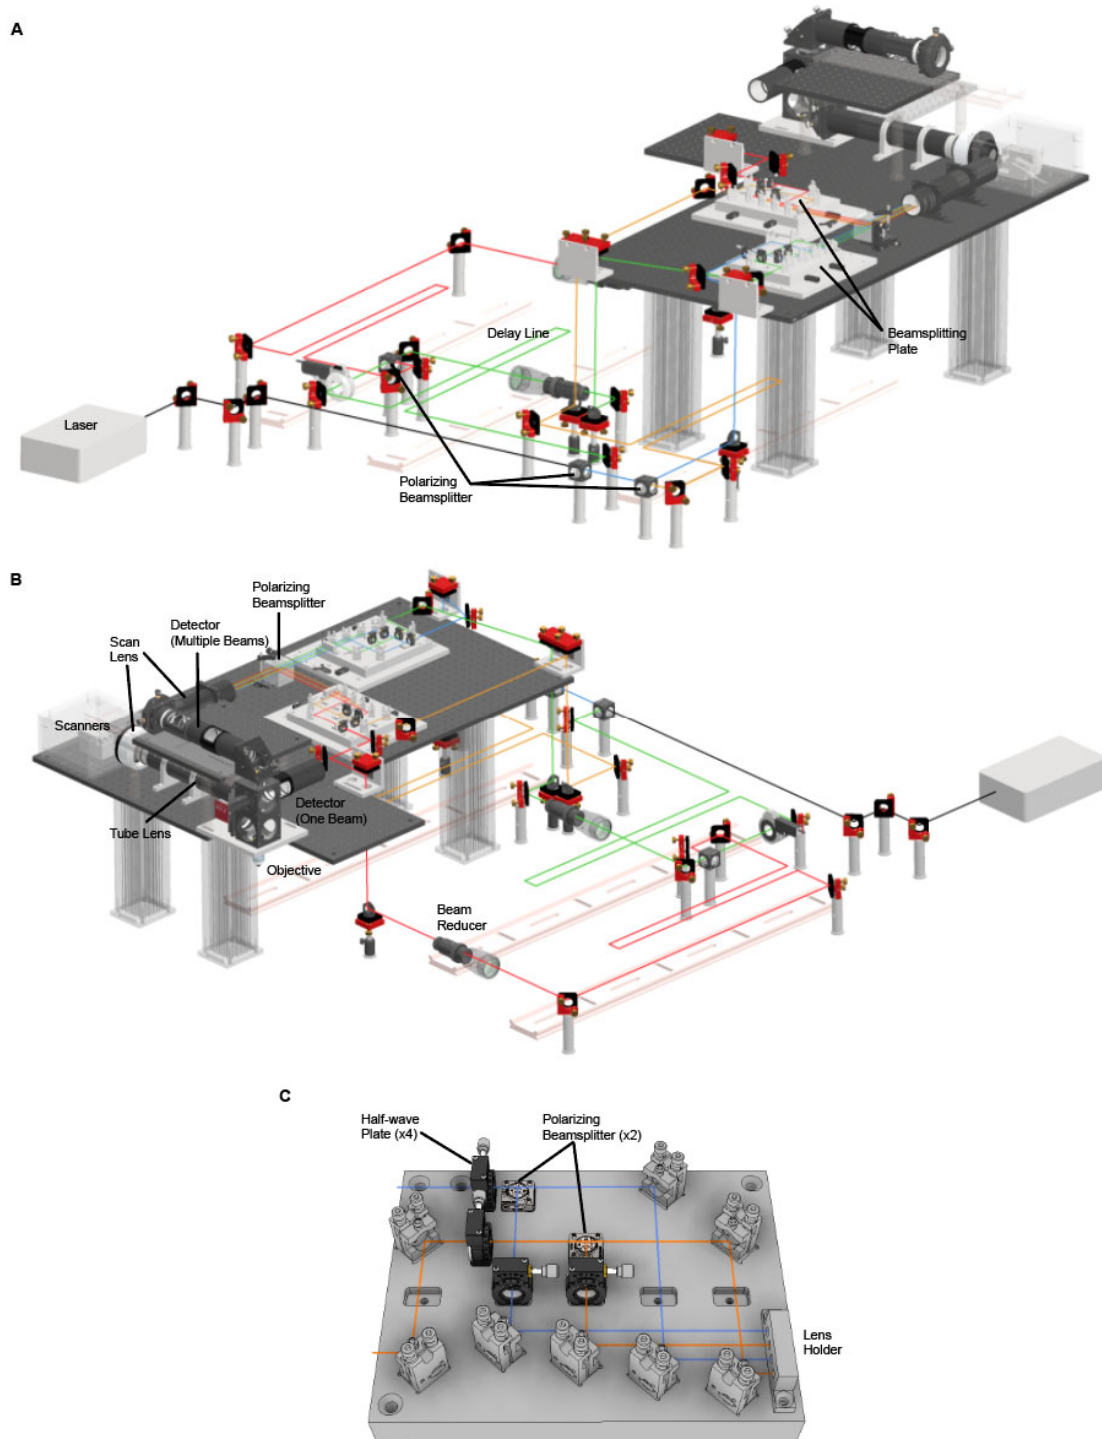

802  
803 **Figure S1 related to Figure 3. Opto-mechanical design of UF2P microscope. (A-B) CAD design**  
804 **Rendering of the Uf2P microscope. (C) CAD design rendering of the beam splitter plate.**

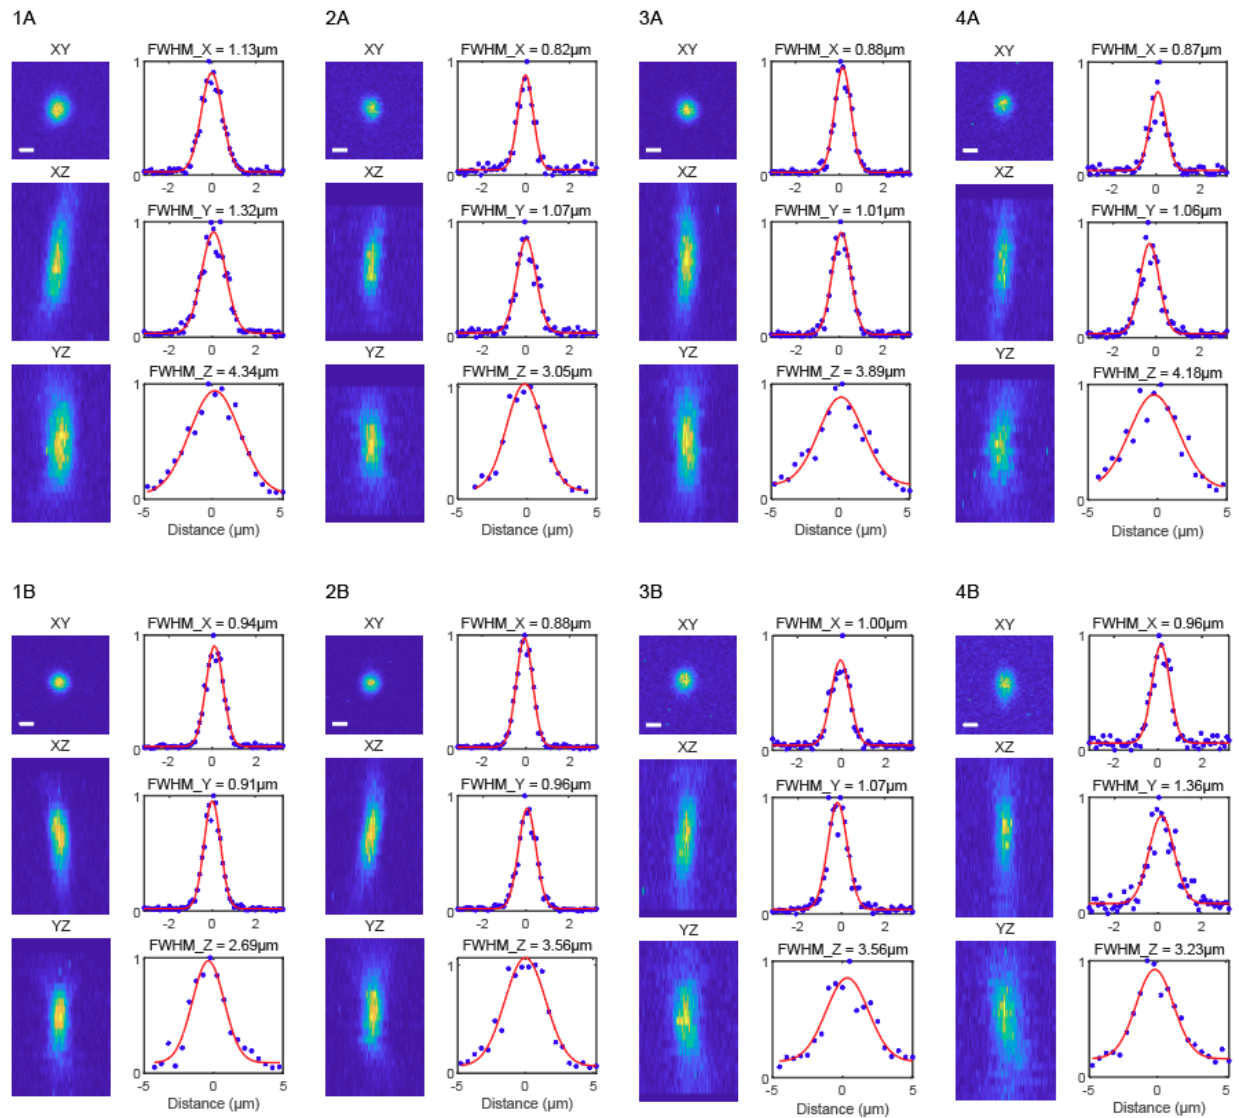

805  
806  
807

Figure S2 related to Figure 3. Example point spread function measurements for each beamlet in the UF2P microscope.



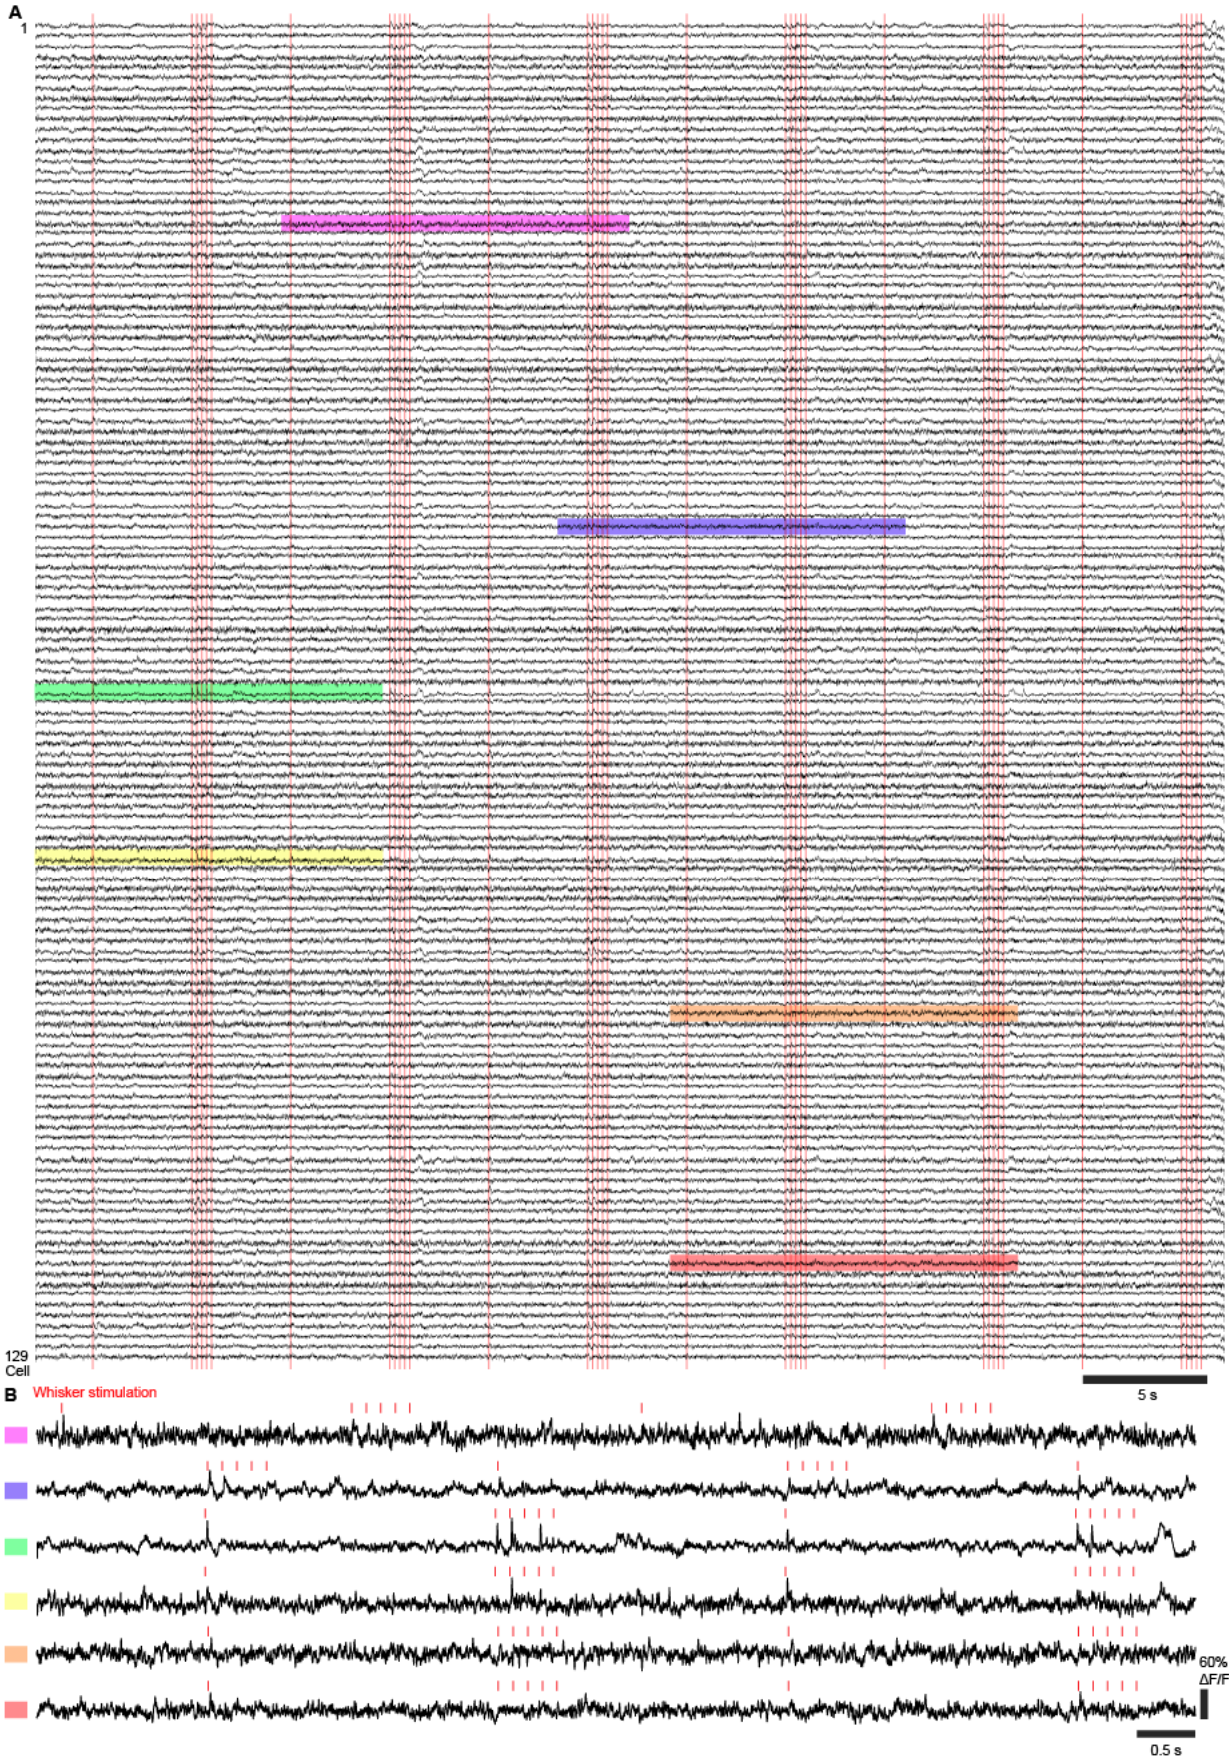

809 **Figure S3 related to Figure 5. *In vivo* population imaging of SpikeyGi from UF2P microscope. (A)**  
810 Fluorescence traces from simultaneous recordings across 129 S1 neurons from the UF2P microscope  
811 acquired at 803 Hz. Raw images were denoised with DeepVID. For visualization purposes, traces are  
812 detrended with 2.5 sec moving average and low pass filtered at 200 Hz. Red lines indicate air puff whisker  
813 stimulus. Detected action potentials are plotted in Figure 5B. **(B)** Magnified view of example traces across  
814 different cells. Squares denote traces corresponding to shaded regions of the same color indicated in [A].  
815 Red lines indicate air puff whisker stimulus.

816 **REFERENCES**

817

818 Abdelfattah, A.S., Kawashima, T., Singh, A., Novak, O., Liu, H., Shuai, Y., Huang, Y.-C., Campagnola, L.,

819 Seeman, S.C., Yu, J., *et al.* (2019). Bright and photostable chemigenetic indicators for extended in vivo

820 voltage imaging. *Science* 365, 699-704.

821 Abdelfattah, A.S., Valenti, R., Zheng, J., Wong, A., Team, G.P., Podgorski, K., Koyama, M., Kim, D.S., and

822 Schreiter, E.R. (2020). A general approach to engineer positive-going eFRET voltage indicators. *Nat*

823 *Commun* 11, 3444.

824 Adam, Y., Kim, J.J., Lou, S., Zhao, Y., Xie, M.E., Brinks, D., Wu, H., Mostajo-Radji, M.A., Kheifets, S., Parot,

825 V., *et al.* (2019). Voltage imaging and optogenetics reveal behaviour-dependent changes in hippocampal

826 dynamics. *Nature* 569, 413-417.

827 Amir, W., Carriles, R., Hoover, E.E., Planchon, T.A., Durfee, C.G., and Squier, J.A. (2007). Simultaneous

828 imaging of multiple focal planes using a two-photon scanning microscope. *Opt Lett* 32, 1731-1733.

829 Bando, Y., Sakamoto, M., Kim, S., Ayzenshtat, I., and Yuste, R. (2019). Comparative Evaluation of

830 Genetically Encoded Voltage Indicators. *Cell Rep* 26, 802-813 e804.

831 Chamberland, S., Yang, H.H., Pan, M.M., Evans, S.W., Guan, S., Chavarha, M., Yang, Y., Salesse, C., Wu,

832 H., Wu, J.C., *et al.* (2017). Fast two-photon imaging of subcellular voltage dynamics in neuronal tissue

833 with genetically encoded indicators. *Elife* 6.

834 Charan, K., Li, B., Wang, M., Lin, C.P., and Xu, C. (2018). Fiber-based tunable repetition rate source for

835 deep tissue two-photon fluorescence microscopy. *Biomed Opt Express* 9, 2304-2311.

836 Chen, J.L., Voigt, F.F., Javadzadeh, M., Krueppel, R., and Helmchen, F. (2016). Long-Range population

837 dynamics of anatomically defined neocortical networks. *Elife* 5, e14679.

838 Cheng, A., Goncalves, J.T., Golshani, P., Arisaka, K., and Portera-Cailliau, C. (2011). Simultaneous two-

839 photon calcium imaging at different depths with spatiotemporal multiplexing. *Nature methods* 8, 139-

840 142.

841 Clough, M., Chen, I.A., Park, S.W., Ahrens, A.M., Stirman, J.N., Smith, S.L., and Chen, J.L. (2021). Flexible

842 simultaneous mesoscale two-photon imaging of neural activity at high speeds. *Nat Commun* 12, 6638.

843 Demas, J., Manley, J., Tejera, F., Barber, K., Kim, H., Traub, F.M., Chen, B., and Vaziri, A. (2021). High-

844 speed, cortex-wide volumetric recording of neuroactivity at cellular resolution using light beads

845 microscopy. *Nat Methods* 18, 1103-1111.

846 Feldmeyer, D., Brecht, M., Helmchen, F., Petersen, C.C., Poulet, J.F., Staiger, J.F., Luhmann, H.J., and

847 Schwarz, C. (2012). Barrel cortex function. *Progress in neurobiology*.

848 Huang, L., Ledochowitsch, P., Knoblich, U., Lecoq, J., Murphy, G.J., Reid, R.C., de Vries, S.E., Koch, C.,  
849 Zeng, H., Buice, M.A., *et al.* (2021). Relationship between simultaneously recorded spiking activity and  
850 fluorescence signal in GCaMP6 transgenic mice. *Elife* 10.

851 Jin, L., Han, Z., Platisa, J., Wooltorton, J.R., Cohen, L.B., and Pieribone, V.A. (2012). Single action  
852 potentials and subthreshold electrical events imaged in neurons with a fluorescent protein voltage  
853 probe. *Neuron* 75, 779-785.

854 Kazemipour, A., Novak, O., Flickinger, D., Marvin, J.S., Abdelfattah, A.S., King, J., Borden, P.M., Kim, J.J.,  
855 Al-Abdullatif, S.H., Deal, P.E., *et al.* (2019). Kiloherz frame-rate two-photon tomography. *Nat Methods*  
856 16, 778-786.

857 Kim, K.H., Buehler, C., Bahlmann, K., Ragan, T., Lee, W.-C.A., Nedivi, E., Heffer, E.L., Fantini, S., and So,  
858 P.T.C. (2007). Multifocal multiphoton microscopy based on multianode photomultiplier tubes. *Opt*  
859 *Express* 15, 11658-11678.

860 Krull, A., Buchholz, T.-O., and Jug, F. (2018). Noise2Void - Learning Denoising from Single Noisy Images.  
861 arXiv:181110980 [cs].

862 Lecoq, J., Oliver, M., Siegle, J.H., Orlova, N., Ledochowitsch, P., and Koch, C. (2021). Removing  
863 independent noise in systems neuroscience data using DeepInterpolation. *Nat Methods* 18, 1401-1408.

864 Li, X., Zhang, G., Wu, J., Zhang, Y., Zhao, Z., Lin, X., Qiao, H., Xie, H., Wang, H., Fang, L., *et al.* (2021).  
865 Reinforcing neuron extraction and spike inference in calcium imaging using deep self-supervised  
866 denoising. *Nat Methods* 18, 1395-1400.

867 Piatkevich, K.D., Bensussen, S., Tseng, H.A., Shroff, S.N., Lopez-Huerta, V.G., Park, D., Jung, E.E.,  
868 Shemesh, O.A., Straub, C., Gritton, H.J., *et al.* (2019). Population imaging of neural activity in awake  
869 behaving mice. *Nature* 574, 413-417.

870 Platisa, J., Han, Z., and Pieribone, V.A. (2020). Different categories of fluorescent proteins result in GEVIs  
871 with similar characteristics. bioRxiv, 2020.2005.2006.081018.

872 Platisa, J., Vasan, G., Yang, A., and Pieribone, V.A. (2017). Directed Evolution of Key Residues in  
873 Fluorescent Protein Inverses the Polarity of Voltage Sensitivity in the Genetically Encoded Indicator  
874 ArcLight. *ACS Chem Neurosci* 8, 513-523.

875 Podgorski, K., and Ranganathan, G. (2016). Brain heating induced by near-infrared lasers during  
876 multiphoton microscopy. *J Neurophysiol* 116, 1012-1023.

877 Sjulson, L., and Miesenbock, G. (2007). Optical recording of action potentials and other discrete  
878 physiological events: a perspective from signal detection theory. *Physiology (Bethesda)* 22, 47-55.

879 Vaswani, A., Shazeer, N., Parmar, N., Uszkoreit, J., Jones, L., Gomez, A.N., Kaiser, Ł., and Polosukhin, I.  
880 (2017). Attention is all you need. Paper presented at: Advances in neural information processing  
881 systems.

882 Villette, V., Chavarha, M., Dimov, I.K., Bradley, J., Pradhan, L., Mathieu, B., Evans, S.W., Chamberland, S.,  
883 Shi, D., Yang, R., *et al.* (2019). Ultrafast Two-Photon Imaging of a High-Gain Voltage Indicator in Awake  
884 Behaving Mice. *Cell* 179, 1590-1608.e1523.

885 Weisenburger, S., Tejera, F., Demas, J., Chen, B., Manley, J., Sparks, F.T., Martinez Traub, F., Daigle, T.,  
886 Zeng, H., Losonczy, A., *et al.* (2019). Volumetric Ca(2+) Imaging in the Mouse Brain Using Hybrid  
887 Multiplexed Sculpted Light Microscopy. *Cell* 177, 1050-1066 e1014.

888 Wilt, B.A., Fitzgerald, J.E., and Schnitzer, M.J. (2013). Photon shot noise limits on optical detection of  
889 neuronal spikes and estimation of spike timing. *Biophys J* 104, 51-62.

890 Wu, J., Liang, Y., Chen, S., Hsu, C.L., Chavarha, M., Evans, S.W., Shi, D., Lin, M.Z., Tsia, K.K., and Ji, N.  
891 (2020). KiloHertz two-photon fluorescence microscopy imaging of neural activity in vivo. *Nat Methods*  
892 17, 287-290.

893 Zhang, K., Zuo, W., Chen, Y., Meng, D., and Zhang, L. (2017). Beyond a Gaussian Denoiser: Residual  
894 Learning of Deep CNN for Image Denoising. *IEEE Trans Image Process* 26, 3142-3155.

895 Zhang, T., Hernandez, O., Chrapkiewicz, R., Shai, A., Wagner, M.J., Zhang, Y., Wu, C.H., Li, J.Z., Inoue, M.,  
896 Gong, Y., *et al.* (2019). KiloHertz two-photon brain imaging in awake mice. *Nat Methods* 16, 1119-1122.

897
